# Supplementary material for: Home-Based Walking Exercise and Supervised Treadmill Exercise in Patients With Peripheral Artery Disease: An Individual Participant Data Meta-Analysis
Source: PubMed Central journal article supplement (PMC10514734; doi:10.1001/jamanetworkopen.2023.34590), 2023-09-21
Supplement: jamanetwopen-e2334590-s001.pdf [file jamanetwopen-e2334590-s001.pdf]

## Supplemental Online Content

Thangada ND, Zhang D, Tian L, et al. Home-based walking exercise and supervised treadmill exercise in patients with peripheral artery disease: an individual participant data meta-analysis. *JAMA Netw Open*. 2023;6(9):e2334590. doi:10.1001/jamanetworkopen.2023.34590

**eTable 1.** Supervised Treadmill Exercise and Home-Based Walking Exercise Clinical Trials Included in Analysis

**eTable 2.** 6-Month Change in Study Outcomes Among Participants with PAD Randomized to Supervised Treadmill Exercise or Non-Exercise Control (n=370)

**eTable 3.** 6-Month Change in Study Outcomes Among Participants with PAD Randomized to Home-Based Walking Exercise or Non-Exercise Control (n=349)

**eTable 4.** Baseline Characteristics of Supervised Treadmill Exercise Trials by Study

**eTable 5.** Baseline Characteristics of Home-Based Walking Exercise Trials by Study

**eFigure 1.** Consort Diagram for Supervised Treadmill Exercise Randomized Clinical Trials Included in Post Hoc Analyses

**eFigure 2.** Consort Diagram for Home-Based Walking Exercise Randomized Clinical Trials Included in Post Hoc Analyses

This supplemental material has been provided by the authors to give readers additional information about their work.

**Supplemental Table 1. Supervised Treadmill Exercise and Home-Based Walking Exercise Clinical Trials Included in Analysis**

| Trial Name                                                                                                                                                       | N                         | Sites/Dates                                                                        | Primary Specific Aim                                                                                                                                                                                                                                                                                  | Randomization                                                                                                       | Groups                                                                                                                                                                                                         | Other                                                                                                                                                                            |
|------------------------------------------------------------------------------------------------------------------------------------------------------------------|---------------------------|------------------------------------------------------------------------------------|-------------------------------------------------------------------------------------------------------------------------------------------------------------------------------------------------------------------------------------------------------------------------------------------------------|---------------------------------------------------------------------------------------------------------------------|----------------------------------------------------------------------------------------------------------------------------------------------------------------------------------------------------------------|----------------------------------------------------------------------------------------------------------------------------------------------------------------------------------|
| Study to Improve Leg Circulation (SILC)                                                                                                                          | 156 participants with PAD | Chicago, IL<br>4/2004-8/2008                                                       | To determine whether supervised treadmill exercise and whether lower extremity strength training improved 6MW, compared to attention control.                                                                                                                                                         | Randomly permuted block method stratified by presence or absence of intermittent claudication.                      | 1. Supervised treadmill exercise only<br>2. Supervised lower extremity resistance training only<br>3. Non-exercise control                                                                                     | Supervised exercise significantly improved six-minute walk distance and treadmill walking time.<br><br>Strength training did not significantly improve six-minute walk distance. |
| Effect of Granulocyte Stimulating Factor (GM-CSF) With or Without Supervised Exercise on Walking Performance in Patients with Peripheral Artery Disease (PROPEL) | 210 participants with PAD | Chicago, IL<br>1/2012-12/2016                                                      | 1.To determine whether GM-CSF combined with supervised treadmill exercise improved 6MW distance, compared with exercise alone and compared with GM-CSF alone.<br>2.To determine whether GM-CSF alone improved 6MW more than placebo and whether exercise improved 6MW more than an attention control. | Randomly permuted block method stratified by diabetes status. Block sizes were randomly selected from 8 and 12.     | 1.Supervised treadmill exercise plus GM-CSF<br>2. Supervised treadmill exercise plus placebo<br>3. Non-exercise control plus GM-CSF<br>4. Non-exercise control plus placebo                                    | Supervised exercise significantly improved six-minute walk distance.<br><br>GM-CSF had no significant effect on 6MW.                                                             |
| Effect of Telmisartan on Walking Performance in Patients with Lower Extremity Peripheral Artery Disease (TELEX)                                                  | 114 participants with PAD | Chicago, IL and New Orleans, LA<br>12/2015-11/2021                                 | To determine whether telmisartan improves 6MWT compared to a placebo.                                                                                                                                                                                                                                 | Randomly permuted block method stratified by consent to muscle biopsy. Block sizes randomly selected from 8 and 12. | 1.Supervised treadmill exercise plus telmisartan<br>2. Supervised exercise plus placebo<br>3. Non-exercise control plus telmisartan<br>4. Non-exercise control plus placebo                                    | Telmisartan had no significant effect on 6MW.                                                                                                                                    |
| Group Oriented Arterial Leg Study to Improve Walking Performance in Patients with Peripheral Artery Disease (GOALS)                                              | 194 participants with PAD | Chicago, IL<br>11/2008-12/2012                                                     | To determine if a Group-Mediated Cognitive Behavioral intervention improves functional performance.                                                                                                                                                                                                   | Randomly permuted block method stratified by baseline 6MW.                                                          | 1.Home-based walking exercise<br>2. Non-exercise control                                                                                                                                                       | A Group-Mediated Cognitive Behavioral intervention significantly improved 6MW.                                                                                                   |
| Effect of Low-Intensity vs High-Intensity Home-Based Walking Exercise on Walk Distance in Patients with Peripheral Artery Disease (LITE)                         | 305 participants with PAD | Chicago, IL, New Orleans, LA, Pittsburgh, PA and Minneapolis, MN<br>9/2015-10/2020 | To determine if a low-intensity walking exercise intervention, conducted at a pace without ischemic leg symptoms, improves 6MW compared to a high-intensity walking intervention, conducted at a pace with ischemic leg symptoms.                                                                     | Randomly permuted block method with block sizes of 61 stratified by site and presence or absence of muscle biopsy.  | 1. Home-based walking exercise at low-intensity (pace not inducing ischemic leg symptoms)<br>2. Home-based walking exercise at high-intensity (pace inducing ischemic leg symptoms)<br>3. Non-exercise control | Only high-intensity home-based walking exercise was effective and significantly improved 6MW.                                                                                    |

**Supplemental Table 2. 6-Month Change in Study Outcomes Among Participants with PAD Randomized to Supervised Treadmill Exercise or Non-Exercise Control (n=370)**

| Outcome                                       | Trial         | N   | 6-Month Change in Outcome for Supervised Treadmill Exercise, mean (SE) | 6-Month Change in Outcome for Non-Exercise Control, mean (SE) | Between Group Difference (95% CI) |                         | P Value |
|-----------------------------------------------|---------------|-----|------------------------------------------------------------------------|---------------------------------------------------------------|-----------------------------------|-------------------------|---------|
|                                               |               |     |                                                                        |                                                               | Unadjusted                        | Adjusted                |         |
| Six-minute walk distance (meters)             | SILC          | 95  | 20.91 (7.44)                                                           | -15.02 (7.51)                                                 | 35.93 (14.94, 56.92)              | 36.85 (15.15, 58.55)    | 0.0011  |
|                                               | PROPEL        | 161 | 34.26 (7.46)                                                           | -3.23 (7.41)                                                  | 37.49 (16.73, 58.25)              | 39.35 (19.09, 59.62)    | 0.0002  |
|                                               | TELEX         | 80  | 18.15 (8.16)                                                           | -1.83 (8.16)                                                  | 19.98 (-3.00, 42.96)              | 12.72 (-10.75, 36.18)   | 0.2836  |
|                                               | Meta analysis | 336 | ---                                                                    | ---                                                           | 32.88 (20.16, 45.60)              | 31.78 (19.32, 44.24)    | <.0001  |
| Maximum treadmill walking distance (meters)   | SILC          | 92  | 218.05 (25.10)                                                         | 35.46 (26.22)                                                 | 182.59 (110.48, 254.70)           | 208.92 (134.32, 283.52) | <.0001  |
|                                               | PROPEL        | 156 | 260.15 (23.50)                                                         | 39.96 (23.20)                                                 | 220.20 (154.96, 285.44)           | 203.36 (137.47, 269.25) | <.0001  |
|                                               | TELEX         | 68  | 203.29 (37.77)                                                         | 81.93 (35.61)                                                 | 121.36 (17.72, 225.00)            | 117.11 (4.76, 229.47)   | 0.0413  |
|                                               | Meta analysis | 316 | ---                                                                    | ---                                                           | 188.03 (143.87, 232.19)           | 186.16 (141.77, 230.55) | <.0001  |
| Pain-free treadmill walking distance (meters) | SILC          | 92  | 192.03 (26.30)                                                         | 58.84 (27.47)                                                 | 133.19 (57.64, 208.75)            | 133.94 (58.41, 209.47)  | 0.0007  |
|                                               | PROPEL        | 156 | 154.91 (20.30)                                                         | 53.51 (20.04)                                                 | 101.40 (45.04, 157.75)            | 107.68 (52.87, 162.49)  | 0.0002  |
|                                               | TELEX         | 68  | 176.96 (46.51)                                                         | 118.42 (43.85)                                                | 58.54 (-69.09, 186.17)            | 40.61 (-89.87, 171.09)  | 0.5358  |
|                                               | Meta analysis | 316 | ---                                                                    | ---                                                           | 101.45 (57.11, 145.79)            | 99.04 (54.83, 143.25)   | <.0001  |
| WIQ distance score                            | SILC          | 75  | 17.97 (3.71)                                                           | 4.19 (4.07)                                                   | 13.79 (2.81, 24.77)               | 13.11 (2.04, 24.18)     | 0.0210  |
|                                               | PROPEL        | 161 | 7.61 (2.86)                                                            | 5.71 (2.88)                                                   | 1.90 (-6.12, 9.91)                | 3.48 (-4.40, 11.36)     | 0.3848  |
|                                               | TELEX         | 80  | 7.11 (3.50)                                                            | 2.12 (3.50)                                                   | 4.99 (-4.88, 14.85)               | 2.91 (-7.02, 12.85)     | 0.5606  |
|                                               | Meta analysis | 316 | ---                                                                    | ---                                                           | 5.48 (0.06, 10.90)                | 5.27 (0.03, 10.51)      | 0.0488  |
| WIQ speed score                               | SILC          | 80  | 8.67 (3.45)                                                            | 7.25 (3.81)                                                   | 1.42 (-8.81, 11.66)               | 4.22 (-6.45, 14.90)     | 0.4325  |
|                                               | PROPEL        | 163 | 7.76 (2.70)                                                            | 3.74 (2.69)                                                   | 4.02 (-3.51, 11.55)               | 4.13 (-2.92, 11.17)     | 0.2493  |
|                                               | TELEX         | 80  | 3.02 (3.27)                                                            | 2.09 (3.27)                                                   | 0.92 (-8.29, 10.14)               | -0.95 (-9.92, 8.02)     | 0.8341  |
|                                               | Meta analysis | 323 | ---                                                                    | ---                                                           | 2.61 (-2.44, 7.67)                | 2.70 (-2.01, 7.42)      | 0.2601  |
| WIQ stair-climbing score                      | SILC          | 79  | 9.42 (3.71)                                                            | 1.91 (3.96)                                                   | 7.51 (-3.29, 18.31)               | 6.00 (-4.59, 16.58)     | 0.2622  |
|                                               | PROPEL        | 162 | 4.69 (3.01)                                                            | 2.44 (2.97)                                                   | 2.25 (-6.10, 10.60)               | 4.60 (-3.13, 12.32)     | 0.2415  |
|                                               | TELEX         | 80  | 7.29 (3.98)                                                            | 1.77 (3.98)                                                   | 5.52 (-5.69, 16.73)               | 2.98 (-7.74, 13.70)     | 0.5809  |
|                                               | Meta analysis | 321 | ---                                                                    | ---                                                           | 4.36 (-1.30, 10.01)               | 4.00 (-1.21, 9.21)      | 0.1319  |

Between group difference was estimated using ANCOVA adjusted for study, age, sex, race, smoking, myocardial infarction, heart failure, and baseline measure of outcome variable of interest for unadjusted and adjusted comparisons, respectively.

**Supplemental Table 3. 6-Month Change in Study Outcomes Among Participants with PAD Randomized to Home-Based Walking Exercise or Non-Exercise Control (n=349)**

| Outcome                                       | Trial         | N   | 6-Month Change in Outcome for Home-Based Walking Exercise, mean (SE) | 6-Month Change in Outcome for Non-Exercise Control, mean (SE) | Between Group Difference (95% CI) |                        | P value |
|-----------------------------------------------|---------------|-----|----------------------------------------------------------------------|---------------------------------------------------------------|-----------------------------------|------------------------|---------|
|                                               |               |     |                                                                      |                                                               | Unadjusted                        | Adjusted               |         |
| Six-minute walk distance (meters)             | GOALS         | 169 | 42.73 (7.63)                                                         | -11.69 (7.59)                                                 | 54.42 (33.17, 75.66)              | 59.98 (39.29, 80.68)   | <.0001  |
|                                               | LITE          | 130 | 34.55 (7.30)                                                         | -10.91 (10.04)                                                | 45.45 (20.89, 70.02)              | 51.41 (25.96, 76.85)   | 0.0001  |
|                                               | Meta analysis | 299 | ---                                                                  | ---                                                           | 50.74 (34.76, 66.72)              | 55.59 (39.73, 71.46)   | <.0001  |
| Maximum treadmill walking distance (meters)   | GOALS         | 164 | 89.26 (18.51)                                                        | 33.03 (18.51)                                                 | 56.23 (4.54, 107.92)              | 52.36 (-0.27, 104.99)  | 0.0512  |
|                                               | LITE          | 90  | 97.78 (19.36)                                                        | 38.60 (26.70)                                                 | 59.18 (-6.36, 124.72)             | 52.69 (-15.80, 121.17) | 0.1297  |
|                                               | Meta analysis | 254 | ---                                                                  | ---                                                           | 57.21 (16.74, 97.67)              | 53.65 (12.65, 94.64)   | 0.0105  |
| Pain-free treadmill walking distance (meters) | GOALS         | 164 | 89.26 (18.51)                                                        | 33.03 (18.51)                                                 | 49.98 (6.33, 93.63)               | 42.75 (-0.86, 86.36)   | 0.0546  |
|                                               | LITE          | 90  | 97.78 (19.36)                                                        | 38.60 (26.70)                                                 | 29.44 (-67.59, 126.46)            | 54.92 (-37.39, 147.23) | 0.2400  |
|                                               | Meta analysis | 254 | ---                                                                  | ---                                                           | 43.17 (-0.34, 86.69)              | 42.02 (-0.28, 84.32)   | 0.0515  |
| WIQ distance score                            | GOALS         | 167 | 11.61 (2.59)                                                         | 1.45 (2.61)                                                   | 10.16 (2.91, 17.42)               | 11.16 (4.35, 17.97)    | 0.0015  |
|                                               | LITE          | 133 | 8.72 (2.45)                                                          | 1.15 (1.15)                                                   | 7.57 (-0.58, 15.72)               | 9.84 (1.61, 18.06)     | 0.0195  |
|                                               | Meta analysis | 300 | ---                                                                  | ---                                                           | 9.07 (3.68, 14.46)                | 10.50 (5.35, 15.65)    | <.0001  |
| WIQ speed score                               | GOALS         | 169 | 11.57 (2.61)                                                         | 1.84 (2.59)                                                   | 9.73 (2.47, 16.98)                | 8.68 (2.21, 15.15)     | 0.0088  |
|                                               | LITE          | 133 | 7.13 (2.32)                                                          | -4.95 (3.14)                                                  | 12.08 (4.36, 19.80)               | 10.52 (3.40, 17.63)    | 0.0041  |
|                                               | Meta analysis | 302 | ---                                                                  | ---                                                           | 10.71 (5.44, 15.99)               | 9.67 (4.94, 14.40)     | <.0001  |
| WIQ stair-climbing score                      | GOALS         | 169 | 8.73 (2.96)                                                          | 0.10 (2.94)                                                   | 8.63 (0.39, 16.87)                | 9.30 (2.36, 16.25)     | 0.0090  |
|                                               | LITE          | 133 | 4.41 (2.71)                                                          | -4.96 (3.67)                                                  | 9.37 (0.35, 18.40)                | 12.67 (3.78, 21.56)    | 0.0056  |
|                                               | Meta analysis | 302 | ---                                                                  | ---                                                           | 8.94 (2.89, 15.00)                | 10.56 (5.11, 16.01)    | 0.0002  |

Between group difference was estimated using ANCOVA adjusted for study, age, sex, race, smoking, myocardial infarction, heart failure, and baseline measure of outcome variable of interest for unadjusted and adjusted comparisons, respectively.

**Supplemental Table 4. Baseline Characteristics of Supervised Treadmill Exercise Trials by Study**

| Baseline variable                                              | SILC                       |                 |         | PROPEL                     |                 |         | TELEX                      |                 |         |
|----------------------------------------------------------------|----------------------------|-----------------|---------|----------------------------|-----------------|---------|----------------------------|-----------------|---------|
|                                                                | Supervised exercise (N=51) | Control (N=53)  | P value | Supervised exercise (N=87) | Control (N=89)  | P value | Supervised exercise (N=44) | Control (N=46)  | P value |
| Age (years), mean (SD)                                         | 71.67 (8.68)               | 68.51 (11.87)   | 0.1258  | 66.62 (8.89)               | 66.10 (7.29)    | 0.6718  | 67.20 (9.87)               | 66.50 (10.93)   | 0.7494  |
| Male, n (%)                                                    | 24 (47.06)                 | 25 (47.17)      | 0.9910  | 53 (60.92)                 | 56 (62.92)      | 0.7845  | 25 (56.82)                 | 28 (60.87)      | 0.6962  |
| African American, n (%)                                        | 21 (41.18)                 | 26 (49.06)      | 0.4195  | 55 (63.22)                 | 66 (74.16)      | 0.1175  | 28 (63.64)                 | 32 (69.57)      | 0.5509  |
| Ankle brachial index, mean (SD)                                | 0.61 (0.18)                | 0.60 (0.18)     | 0.7520  | 0.69 (0.18)                | 0.70 (0.18)     | 0.6682  | 0.75 (0.23)                | 0.74 (0.26)     | 0.8902  |
| Body mass index (kg/m <sup>2</sup> ), mean (SD)                | 29.93 (6.16)               | 30.42 (7.12)    | 0.7070  | 30.97 (6.25)               | 30.71 (7.03)    | 0.7974  | 29.27 (7.53)               | 28.56 (6.14)    | 0.6279  |
| Current smoker, n (%)                                          | 11 (21.57)                 | 17 (32.08)      | 0.2272  | 35 (40.23)                 | 26 (29.21)      | 0.1247  | 22 (50.00)                 | 25 (54.35)      | 0.6798  |
| Myocardial infarction, n (%)                                   | 12 (24.00)                 | 7 (13.21)       | 0.1581  | 16 (18.39)                 | 22 (24.72)      | 0.3077  | 5 (11.36)                  | 10 (21.74)      | 0.1867  |
| Heart failure, n (%)                                           | 4 (8.16)                   | 9 (16.98)       | 0.1821  | 8 (9.20)                   | 14 (15.73)      | 0.1900  | 1 (2.27)                   | 5 (10.87)       | 0.1022  |
| Stroke, n (%)                                                  | 11 (22.00)                 | 10 (18.87)      | 0.6933  | 13 (14.94)                 | 18 (20.22)      | 0.3577  | 8 (18.18)                  | 4 (8.70)        | 0.1857  |
| Angina, n (%)                                                  | 6 (11.76)                  | 4 (7.69)        | 0.4852  | 15 (17.24)                 | 18 (20.22)      | 0.6122  | 5 (11.36)                  | 2 (4.35)        | 0.2141  |
| Pulmonary disease, n (%)                                       | 3 (5.88)                   | 9 (17.65)       | 0.0652  | 11 (12.64)                 | 10 (11.24)      | 0.7733  | 10 (22.73)                 | 11 (23.91)      | 0.8942  |
| Cancer, n (%)                                                  | 12 (23.53)                 | 8 (15.09)       | 0.2752  | 16 (18.39)                 | 15 (16.85)      | 0.7890  | 9 (20.45)                  | 7 (15.22)       | 0.5160  |
| Diabetes, n (%)                                                | 20 (39.22)                 | 25 (47.17)      | 0.4131  | 33 (37.93)                 | 33 (37.08)      | 0.9070  | 16 (36.36)                 | 13 (28.26)      | 0.4109  |
| IC (Intermittent claudication), n (%)                          | 18 (35.29)                 | 20 (37.74)      | 0.6702  | 31 (35.63)                 | 22 (24.72)      | 0.2357  | 4 (9.09)                   | 6 (13.04)       | 0.5837  |
| Leg pain not IC, n (%)                                         | 29 (56.86)                 | 31 (58.49)      |         | 52 (59.77)                 | 64 (71.91)      |         | 36 (81.82)                 | 38 (82.61)      |         |
| Asymptomatic leg pain, n (%)                                   | 4 (7.84)                   | 2 (3.77)        |         | 4 (4.60)                   | 3 (3.37)        |         | 4 (9.09)                   | 2 (4.35)        |         |
| Six-minute walk distance (meters), mean (SD)                   | 327.80 (86.96)             | 316.58 (83.20)  | 0.5026  | 330.81 (102.47)            | 336.24 (98.38)  | 0.7203  | 316.51 (118.99)            | 359.92 (110.00) | 0.0756  |
| Total treadmill distance (meters), mean (SD)                   | 383.02 (241.07)            | 322.54 (204.14) | 0.1698  | 339.92 (267.62)            | 383.96 (235.89) | 0.2482  | 330.17 (202.99)            | 438.19 (294.64) | 0.0468  |
| Treadmill distance at onset of leg symptom (meters), mean (SD) | 202.46 (212.87)            | 155.78 (116.23) | 0.1661  | 184.40 (204.59)            | 183.92 (185.49) | 0.9871  | 149.10 (127.42)            | 238.54 (241.27) | 0.0316  |
| WIQ distance score, mean (SD)                                  | 26.04 (19.09)              | 30.52 (24.01)   | 0.3236  | 31.41 (25.99)              | 32.12 (25.12)   | 0.8554  | 37.74 (34.82)              | 38.28 (27.08)   | 0.9339  |

|                                     |                  |                  |        |                  |                  |        |                  |               |        |
|-------------------------------------|------------------|------------------|--------|------------------|------------------|--------|------------------|---------------|--------|
| WIQ speed score, mean (SD)          | 32.10<br>(22.88) | 27.87<br>(18.01) | 0.3127 | 34.36<br>(24.72) | 35.16<br>(24.51) | 0.8288 | 34.76<br>(25.67) | 39.11 (24.54) | 0.4134 |
| WIQ stair-climbing score, mean (SD) | 41.03<br>(24.66) | 42.24<br>(24.86) | 0.8112 | 49.27<br>(29.92) | 45.88<br>(28.31) | 0.4419 | 44.98<br>(30.55) | 51.99 (29.93) | 0.2744 |

**Supplemental Table 5. Baseline Characteristics of Home-Based Walking Exercise Trials by Study**

| Baseline variable                                              | GOALS                      |                 |         | LITE                        |                 |               |
|----------------------------------------------------------------|----------------------------|-----------------|---------|-----------------------------|-----------------|---------------|
|                                                                | Home-based exercise (N=92) | Control (N=92)  | P value | Home-based exercise (N=106) | Control (N=59)  | P value       |
| Age (years), mean (SD)                                         | 69.09 (9.45)               | 71.15 (9.69)    | 0.1449  | 68.80 (8.50)                | 69.75 (9.91)    | 0.5206        |
| Male, n (%)                                                    | 47 (51.09)                 | 45 (48.91)      | 0.7681  | 52 (49.06)                  | 30 (50.85)      | 0.8255        |
| African American, n (%)                                        | 51 (55.43)                 | 41 (44.57)      | 0.1404  | 65 (61.32)                  | 30 (50.85)      | 0.1920        |
| Ankle brachial index, mean (SD)                                | 0.67 (0.16)                | 0.68 (0.18)     | 0.7822  | 0.73 (0.23)                 | 0.78 (0.29)     | 0.2253        |
| Body mass index (kg/m <sup>2</sup> ), mean (SD)                | 29.00 (7.03)               | 28.85 (6.58)    | 0.8812  | 31.34 (7.55)                | 30.37 (6.81)    | 0.4142        |
| Current smoker, n (%)                                          | 24 (26.09)                 | 20 (21.74)      | 0.4894  | 21 (19.81)                  | 12 (20.34)      | 0.9353        |
| Myocardial infarction, n (%)                                   | 13 (14.13)                 | 13 (14.13)      | 1.0000  | 28 (26.42)                  | 6 (10.17)       | <b>0.0134</b> |
| Heart failure, n (%)                                           | 9 (9.78)                   | 10 (10.87)      | 0.8086  | 19 (17.92)                  | 7 (11.86)       | 0.3058        |
| Stroke, n (%)                                                  | 9 (9.78)                   | 13 (14.13)      | 0.3634  | 25 (23.58)                  | 19 (32.20)      | 0.2302        |
| Angina, n (%)                                                  | 14 (15.22)                 | 15 (16.48)      | 0.8146  | 20 (18.87)                  | 10 (16.95)      | 0.7594        |
| Pulmonary disease, n (%)                                       | 13 (14.13)                 | 13 (14.13)      | 1.0000  | 17 (16.04)                  | 9 (15.25)       | 0.8947        |
| Cancer, n (%)                                                  | 15 (16.30)                 | 14 (15.38)      | 0.8647  | 19 (17.92)                  | 16 (27.12)      | 0.1662        |
| Diabetes, n (%)                                                | 26 (28.26)                 | 34 (36.96)      | 0.2084  | 46 (43.40)                  | 30 (50.85)      | 0.3574        |
| IC (Intermittent claudication), n (%)                          | 30 (32.61)                 | 20 (21.74)      | 0.2140  | 19 (17.92)                  | 11 (18.64)      | 0.8416        |
| Leg pain not IC, n (%)                                         | 54 (58.70)                 | 65 (70.65)      |         | 82 (77.36)                  | 44 (74.58)      |               |
| Asymptomatic leg pain, n (%)                                   | 8 (8.70)                   | 7 (7.61)        |         | 5 (4.72)                    | 4 (6.78)        |               |
| Six-minute walk distance (meters), mean (SD)                   | 355.16 (96.52)             | 352.41 (92.40)  | 0.8434  | 325.07 (101.56)             | 329.79 (85.86)  | 0.7635        |
| Total treadmill distance (meters), mean (SD)                   | 404.22 (249.14)            | 378.05 (256.58) | 0.4835  | 352.16 (243.57)             | 403.06 (232.54) | 0.1929        |
| Treadmill distance at onset of leg symptom (meters), mean (SD) | 163.63 (141.18)            | 188.28 (202.05) | 0.3387  | 156.11 (157.20)             | 154.13 (129.73) | 0.9346        |
| WIQ distance score, mean (SD)                                  | 34.25 (27.50)              | 32.15 (26.23)   | 0.5979  | 32.42 (25.93)               | 36.03 (26.18)   | 0.3942        |
| WIQ speed score, mean (SD)                                     | 34.91 (23.50)              | 33.72 (23.14)   | 0.7290  | 34.68 (22.87)               | 40.05 (24.59)   | 0.1619        |
| WIQ stair-climbing score, mean (SD)                            | 47.83 (25.79)              | 46.29 (25.55)   | 0.6846  | 47.52 (27.37)               | 45.20 (24.50)   | 0.5880        |

**Supplemental Figure 1. Consort Diagram for Supervised Treadmill Exercise Randomized Clinical Trials Included in Post Hoc Analyses**

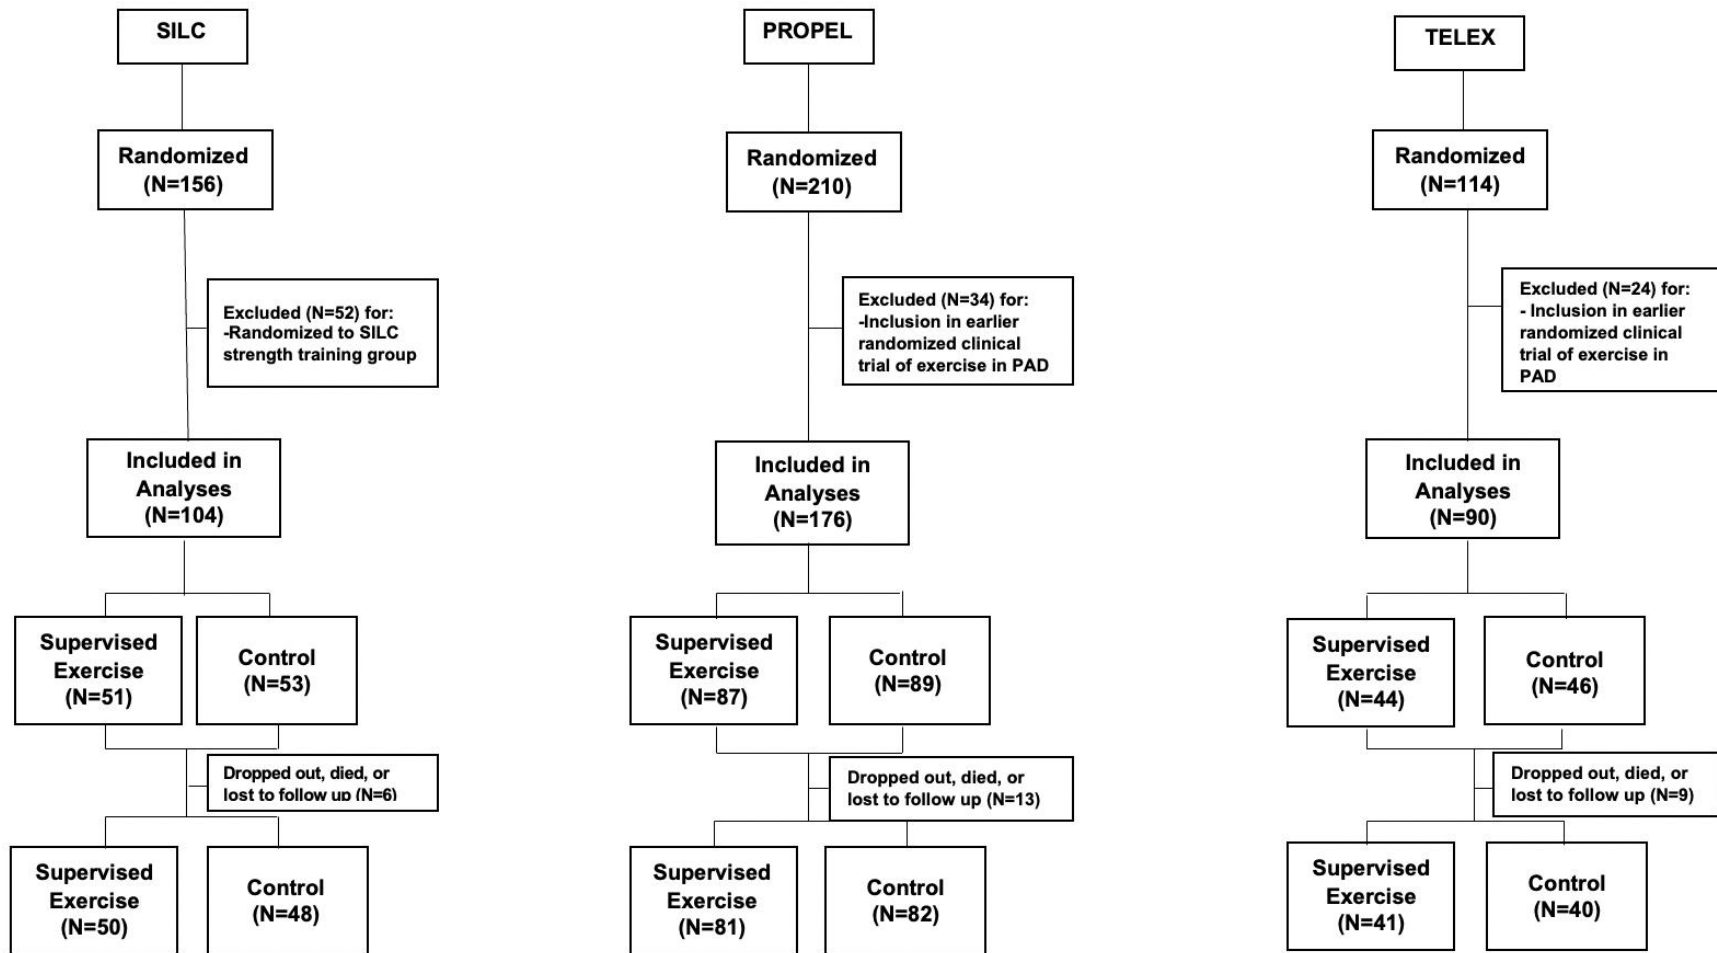



**Supplemental Figure 2. Consort Diagram for Home-Based Walking Exercise Randomized Clinical Trials Included in Post Hoc Analyses**

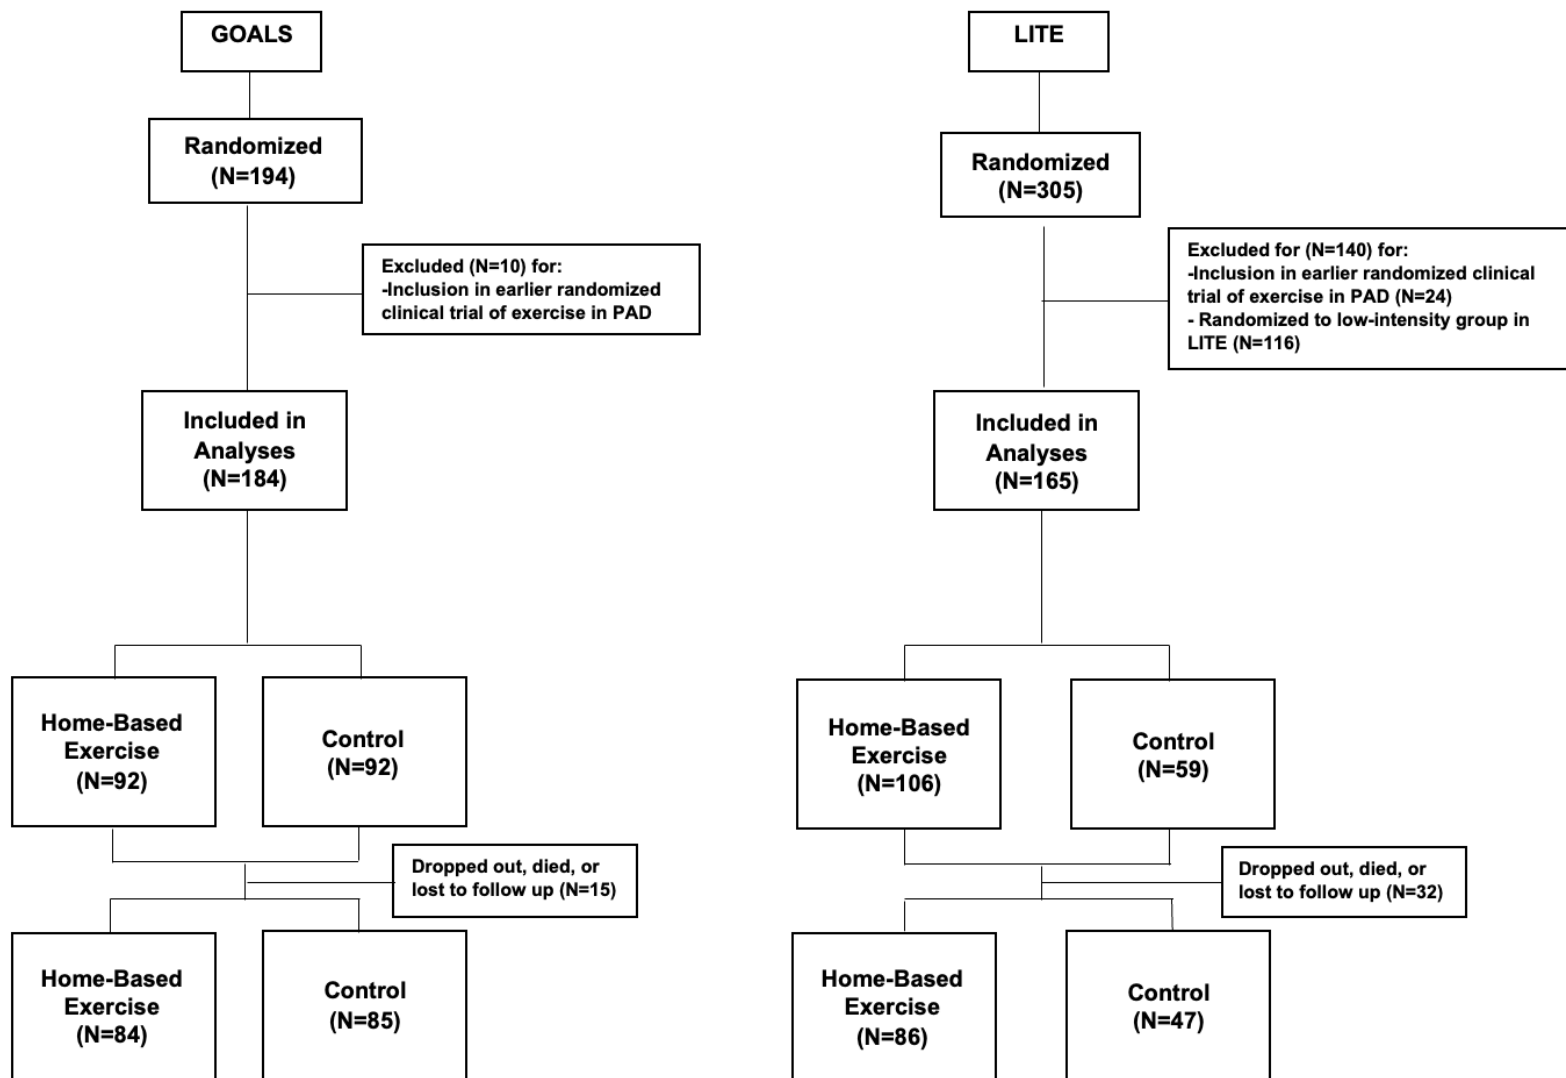

## SAS code and results for JNO revision

## 1. Table 1

## SAS code:

```

**Read in analyses dataset;
data master;
set 'location\dataset';
run;

**supervised exercise groups vs home based exercise groups;
data exercise;
set master;
if group1 ^= 'Control';
if study in ('1 SILC' '3 PROPEL' '5 TELEX') then study2 = 'supervised';
if study in ('2 GOALS' '4 LITE') then study2 = 'home-based';
run;

proc glm data = exercise;
class study2;
model age abi0 bmi0 dist6min_m0 t_dist_meter0 on_dist_meter0 distscr0
speedscr0 climbscr0 = study2/solution;
means study2;
run;

proc NPAR1WAY data=exercise wilcoxon;
class study2;
var age abi0 bmi0 dist6min_m0 t_dist_meter0 on_dist_meter0 distscr0 speedscr0
climbscr0;
run;

proc freq data = exercise;
table (gender aarace cur_smoker0 MIO CHF0 stroke0 angina0 pulmdx0 cancer0
diabetes0 leg_sym_bv)*study2/norow nopercent chisq;
run;

**supervised studies control vs home based studies control;
data control;
set master;
if group1 = 'Control';
if study in ('1 SILC' '3 PROPEL' '5 TELEX') then study2 = 'supervised';
if study in ('2 GOALS' '4 LITE') then study2 = 'home-based';
run;
proc glm data = control;
class study2;
model age abi0 bmi0 dist6min_m0 t_dist_meter0 on_dist_meter0 distscr0
speedscr0 climbscr0 = study2/solution;
means study2;
run;

proc NPAR1WAY data=control wilcoxon;
class study2;
var age abi0 bmi0 dist6min_m0 t_dist_meter0 on_dist_meter0 distscr0 speedscr0
climbscr0;
run;

```

```
proc freq data = control;
table (gender aarace cur_smoker0 MI0 CHF0 stroke0 angina0 pulmdx0 cancer0
diabetes0 leg_sym_bv)*study2/norow nopercnt chisq;
run;
```

## 2. Table 2

Data in Current Table 2 can be found in Supplemental Table 2 and 3, 7<sup>th</sup> column of each table.

## 3. Supplemental Table 2

### Illustrative SAS code:

```
%macro ana2(indata=, var=, name=, blv=);
title 'Group mean and stddev';
proc means data = &indata n mean stddev maxdec=2;
class group2;
var &var;
run;

title 'Unadjusted';
proc glm data=&indata;
class group2(ref='Control') %if &indata=sup_con %or &indata=home_con %then
%do; study %end;;
model &var = group2 %if &indata=sup_con %or &indata=home_con %then %do; study
%end;/solution;
lsmeans group2/tdiff pdiff cl STDERR;
ods output "Type III Model ANOVA"=a1 LSMeansCL=a2 LSMeansDiffCL=a3;
run;

title 'Adjusted IPD';
proc glm data=&indata;
class group2(ref='Control') gender aarace(ref='0') cur_smoker0(ref='0')
MI0(ref='0') CHF0(ref='0') %if &indata=sup_con %or &indata=home_con %then
%do; study %end;;
model &var = group2 &blv age gender aarace cur_smoker0 MI0 CHF0 %if
&indata=sup_con %or &indata=home_con %then %do; study %end;/solution;
lsmeans group2/tdiff pdiff cl stderr ;
ods output "Type III Model ANOVA"=b1 LSMeansCL=b2 LSMeansDiffCL=b3;
run;

%mend;

**example: six-minute walk outcome;
%ana2(indata=SILC, var=ch_dist6min_m60, name=dist6min, blv=dist6min_m0);
%ana2(indata=PROPEL, var=ch_dist6min_m60, name=dist6min, blv=dist6min_m0);
%ana2(indata=TELEX, var=ch_dist6min_m60, name=dist6min, blv=dist6min_m0);
%ana2(indata=sup_con, var=ch_dist6min_m60, name=dist6min, blv=dist6min_m0);
```

**SAS output results:**

\*\*six-minute walk;

\*\*SILC;

Group mean and stddev

The MEANS Procedure

| Analysis Variable : ch_dist6min_m60 |       |    |        |         |
|-------------------------------------|-------|----|--------|---------|
| group2                              | N Obs | N  | Mean   | Std Dev |
| Control                             | 53    | 47 | -15.02 | 55.54   |
| Supervised exercise                 | 51    | 48 | 20.91  | 47.25   |

Unadjusted

The GLM Procedure  
Least Squares Means

| group2              | ch_dist6min_m60 LSMEAN | Standard Error | H0:LSMEAN=0 | H0:LSMean1=LSMean2 |         |
|---------------------|------------------------|----------------|-------------|--------------------|---------|
|                     |                        |                | Pr >  t     | t Value            | Pr >  t |
| Supervised exercise | 20.9105500             | 7.4356001      | 0.0060      | 3.40               | 0.0010  |
| Control             | -15.0195064            | 7.5142859      | 0.0486      |                    |         |

| group2              | ch_dist6min_m60 LSMEAN | 95% Confidence Limits |           |
|---------------------|------------------------|-----------------------|-----------|
| Supervised exercise | 20.910550              | 6.144922              | 35.676178 |
| Control             | -15.019506             | -29.941389            | -0.097624 |

Least Squares Means for Effect group2

| i | j | Difference Between Means | 95% Confidence Limits for LSMean(i)-LSMean(j) |           |
|---|---|--------------------------|-----------------------------------------------|-----------|
| 1 | 2 | 35.930056                | 14.937525                                     | 56.922587 |

Adjusted IPD

The GLM Procedure  
Least Squares Means

| group2              | ch_dist6min_m60 LSMEAN | Standard Error | H0:LSMEAN=0 | H0:LSMean1=LSMean2 |         |
|---------------------|------------------------|----------------|-------------|--------------------|---------|
|                     |                        |                | Pr >  t     | t Value            | Pr >  t |
| Supervised exercise | 17.7721179             | 11.8785475     | 0.1384      | 3.38               | 0.0011  |

| group2  | ch_dist6min_m60 LSMEAN | Standard Error | H0:LSMEAN=0 | H0:LSMean1=LSMean2 |         |
|---------|------------------------|----------------|-------------|--------------------|---------|
|         |                        |                | Pr >  t     | t Value            | Pr >  t |
| Control | -19.0773777            | 10.7064336     | 0.0784      |                    |         |

| group2              | ch_dist6min_m60 LSMEAN | 95% Confidence Limits |           |
|---------------------|------------------------|-----------------------|-----------|
| Supervised exercise | 17.772118              | -5.853835             | 41.398071 |
| Control             | -19.077378             | -40.372043            | 2.217288  |

| Least Squares Means for Effect group2 |   |                          |                                               |           |
|---------------------------------------|---|--------------------------|-----------------------------------------------|-----------|
| i                                     | j | Difference Between Means | 95% Confidence Limits for LSMean(i)-LSMean(j) |           |
| 1                                     | 2 | 36.849496                | 15.153298                                     | 58.545693 |

\*\*PROPEL;

Group mean and stddev

The MEANS Procedure

| Analysis Variable : ch_dist6min_m60 |       |    |       |         |
|-------------------------------------|-------|----|-------|---------|
| group2                              | N Obs | N  | Mean  | Std Dev |
| Control                             | 89    | 81 | -3.23 | 65.89   |
| Supervised exercise                 | 87    | 80 | 34.26 | 67.50   |

Unadjusted

The GLM Procedure  
Least Squares Means

| group2              | ch_dist6min_m60 LSMEAN | Standard Error | H0:LSMEAN=0 | H0:LSMean1=LSMean2 |         |
|---------------------|------------------------|----------------|-------------|--------------------|---------|
|                     |                        |                | Pr >  t     | t Value            | Pr >  t |
| Supervised exercise | 34.2633300             | 7.4563248      | <.0001      | 3.57               | 0.0005  |
| Control             | -3.2286222             | 7.4101552      | 0.6636      |                    |         |

| group2              | ch_dist6min_m60 LSMEAN | 95% Confidence Limits |           |
|---------------------|------------------------|-----------------------|-----------|
| Supervised exercise | 34.263330              | 19.537117             | 48.989543 |
| Control             | -3.228622              | -17.863651            | 11.406406 |

| Least Squares Means for Effect group2 |   |                          |                                               |           |
|---------------------------------------|---|--------------------------|-----------------------------------------------|-----------|
| i                                     | j | Difference Between Means | 95% Confidence Limits for LSMean(i)-LSMean(j) |           |
| 1                                     | 2 | 37.491952                | 16.730319                                     | 58.253585 |

Adjusted IPD

The GLM Procedure  
Least Squares Means

| group2              | ch_dist6min_m60 LSMEAN | Standard Error | H0:LSMEAN=0 | H0:LSMean1=LSMean2 |         |
|---------------------|------------------------|----------------|-------------|--------------------|---------|
|                     |                        |                | Pr >  t     | t Value            | Pr >  t |
| Supervised exercise | 27.1791493             | 10.2575741     | 0.0089      | 3.84               | 0.0002  |
| Control             | -12.1756805            | 10.4980489     | 0.2479      |                    |         |

| group2              | ch_dist6min_m60 LSMEAN | 95% Confidence Limits |           |
|---------------------|------------------------|-----------------------|-----------|
| Supervised exercise | 27.179149              | 6.913322              | 47.444976 |
| Control             | -12.175681             | -32.916612            | 8.565251  |

| Least Squares Means for Effect group2 |   |                          |                                               |           |
|---------------------------------------|---|--------------------------|-----------------------------------------------|-----------|
| i                                     | j | Difference Between Means | 95% Confidence Limits for LSMean(i)-LSMean(j) |           |
| 1                                     | 2 | 39.354830                | 19.093540                                     | 59.616119 |

\*\*TELEX;

Group mean and stddev

The MEANS Procedure

| Analysis Variable : ch_dist6min_m60 |       |    |       |         |
|-------------------------------------|-------|----|-------|---------|
| group2                              | N Obs | N  | Mean  | Std Dev |
| Control                             | 46    | 40 | -1.83 | 47.96   |
| Supervised exercise                 | 44    | 40 | 18.15 | 55.04   |

Unadjusted

The GLM Procedure  
Least Squares Means

| group2              | ch_dist6min_m60 LSMEAN | Standard Error | H0:LSMEAN=0 | H0:LSMean1=LSMean2 |         |
|---------------------|------------------------|----------------|-------------|--------------------|---------|
|                     |                        |                | Pr >  t     | t Value            | Pr >  t |
| Supervised exercise | 18.1508400             | 8.1622239      | 0.0291      | 1.73               | 0.0874  |
| Control             | -1.8288000             | 8.1622239      | 0.8233      |                    |         |

| group2              | ch_dist6min_m60 LSMEAN | 95% Confidence Limits |           |
|---------------------|------------------------|-----------------------|-----------|
| Supervised exercise | 18.150840              | 1.901101              | 34.400579 |
| Control             | -1.828800              | -18.078539            | 14.420939 |

| Least Squares Means for Effect group2 |   |                          |                                               |
|---------------------------------------|---|--------------------------|-----------------------------------------------|
| i                                     | j | Difference Between Means | 95% Confidence Limits for LSMean(i)-LSMean(j) |
| 1                                     | 2 | 19.979640                | -3.000962 42.960242                           |

Adjusted IPD

The GLM Procedure  
Least Squares Means

| group2              | ch_dist6min_m60 LSMEAN | Standard Error | H0:LSMEAN=0 | H0:LSMean1=LSMean2 |         |
|---------------------|------------------------|----------------|-------------|--------------------|---------|
|                     |                        |                | Pr >  t     | t Value            | Pr >  t |
| Supervised exercise | 12.2948901             | 13.8369938     | 0.3772      | 1.08               | 0.2836  |
| Control             | -0.4212325             | 12.5255288     | 0.9733      |                    |         |

| group2              | ch_dist6min_m60 LSMEAN | 95% Confidence Limits |           |
|---------------------|------------------------|-----------------------|-----------|
| Supervised exercise | 12.294890              | -15.295292            | 39.885072 |
| Control             | -0.421232              | -25.396427            | 24.553963 |

| Least Squares Means for Effect group2 |   |                          |                                               |
|---------------------------------------|---|--------------------------|-----------------------------------------------|
| i                                     | j | Difference Between Means | 95% Confidence Limits for LSMean(i)-LSMean(j) |
| 1                                     | 2 | 12.716123                | -10.749754 36.181999                          |

\*\*Supervised exercise studies combined;

Unadjusted

The GLM Procedure  
Least Squares Means

| group2              | ch_dist6min_m60 LSMEAN | Standard Error | H0:LSMEAN=0 |         | H0:LSMean1=LSMean2 |  |
|---------------------|------------------------|----------------|-------------|---------|--------------------|--|
|                     |                        |                | Pr >  t     | t Value | Pr >  t            |  |
| Supervised exercise | 25.3154911             | 4.6730288      | <.0001      | 5.08    | <.0001             |  |
| Control             | -7.5650747             | 4.6794608      | 0.1069      |         |                    |  |

| group2              | ch_dist6min_m60 LSMEAN | 95% Confidence Limits |           |
|---------------------|------------------------|-----------------------|-----------|
| Supervised exercise | 25.315491              | 16.123012             | 34.507970 |
| Control             | -7.565075              | -16.770206            | 1.640057  |

| Least Squares Means for Effect group2 |   |                          |                                               |
|---------------------------------------|---|--------------------------|-----------------------------------------------|
| i                                     | j | Difference Between Means | 95% Confidence Limits for LSMean(i)-LSMean(j) |
| 1                                     | 2 | 32.880566                | 20.159176 45.601956                           |

Adjusted IPD

The GLM Procedure  
Least Squares Means

| group2              | ch_dist6min_m60 LSMEAN | Standard Error | H0:LSMEAN=0 |         | H0:LSMean1=LSMean2 |  |
|---------------------|------------------------|----------------|-------------|---------|--------------------|--|
|                     |                        |                | Pr >  t     | t Value | Pr >  t            |  |
| Supervised exercise | 22.4175819             | 6.8342505      | 0.0012      | 5.02    | <.0001             |  |
| Control             | -9.3621383             | 6.3868042      | 0.1437      |         |                    |  |

| group2              | ch_dist6min_m60 LSMEAN | 95% Confidence Limits |           |
|---------------------|------------------------|-----------------------|-----------|
| Supervised exercise | 22.417582              | 8.972161              | 35.863003 |
| Control             | -9.362138              | -21.927272            | 3.202996  |

| Least Squares Means for Effect group2 |   |                          |                                               |
|---------------------------------------|---|--------------------------|-----------------------------------------------|
| i                                     | j | Difference Between Means | 95% Confidence Limits for LSMean(i)-LSMean(j) |
| 1                                     | 2 | 31.779720                | 19.323990 44.235451                           |



\*\*maximal treadmill walking distance;

\*\*SILC;

Group mean and stddev

The MEANS Procedure

| Analysis Variable : ch_t_dist_meter60 |       |    |        |         |
|---------------------------------------|-------|----|--------|---------|
| group2                                | N Obs | N  | Mean   | Std Dev |
| Control                               | 53    | 44 | 35.46  | 138.00  |
| Supervised exercise                   | 51    | 48 | 218.05 | 201.23  |

Unadjusted

The GLM Procedure  
Least Squares Means

| group2              | ch_t_dist_meter60<br>LSMEAN | Standard<br>Error | H0:LSMEAN=0 | H0:LSMean1=LSMean2 |         |
|---------------------|-----------------------------|-------------------|-------------|--------------------|---------|
|                     |                             |                   | Pr >  t     | t Value            | Pr >  t |
| Supervised exercise | 218.052531                  | 25.102027         | <.0001      | 5.03               | <.0001  |
| Control             | 35.463392                   | 26.218212         | 0.1796      |                    |         |

| group2              | ch_t_dist_meter60<br>LSMEAN | 95% Confidence Limits |            |
|---------------------|-----------------------------|-----------------------|------------|
| Supervised exercise | 218.052531                  | 168.182974            | 267.922089 |
| Control             | 35.463392                   | -16.623662            | 87.550446  |

Least Squares Means for Effect group2

| i | j | Difference Between<br>Means | 95% Confidence Limits for LSMean(i)-LSMean(j) |            |
|---|---|-----------------------------|-----------------------------------------------|------------|
| 1 | 2 | 182.589140                  | 110.477879                                    | 254.700400 |

Adjusted IPD

The GLM Procedure  
Least Squares Means

| group2              | ch_t_dist_meter60<br>LSMEAN | Standard<br>Error | H0:LSMEAN=0 | H0:LSMean1=LSMean2 |         |
|---------------------|-----------------------------|-------------------|-------------|--------------------|---------|
|                     |                             |                   | Pr >  t     | t Value            | Pr >  t |
| Supervised exercise | 221.595803                  | 40.459354         | <.0001      | 5.57               | <.0001  |
| Control             | 12.679290                   | 38.707628         | 0.7441      |                    |         |

| group2              | ch_t_dist_meter60<br>LSMEAN | 95% Confidence Limits |            |
|---------------------|-----------------------------|-----------------------|------------|
| Supervised exercise | 221.595803                  | 141.079123            | 302.112483 |
| Control             | 12.679290                   | -64.351344            | 89.709924  |

| Least Squares Means for Effect group2 |   |                          |                                               |
|---------------------------------------|---|--------------------------|-----------------------------------------------|
| i                                     | j | Difference Between Means | 95% Confidence Limits for LSMean(i)-LSMean(j) |
| 1                                     | 2 | 208.916513               | 134.315857 283.517169                         |

\*\*PROPEL;

Group mean and stddev

The MEANS Procedure

| Analysis Variable : ch_t_dist_meter60 |       |    |        |         |
|---------------------------------------|-------|----|--------|---------|
| group2                                | N Obs | N  | Mean   | Std Dev |
| Control                               | 89    | 79 | 39.96  | 171.21  |
| Supervised exercise                   | 87    | 77 | 260.15 | 236.83  |

Unadjusted

The GLM Procedure  
Least Squares Means

| group2              | ch_t_dist_meter60<br>LSMEAN | Standard Error | H0:LSMEAN=0 | H0:LSMean1=LSMean2 |         |
|---------------------|-----------------------------|----------------|-------------|--------------------|---------|
|                     |                             |                | Pr >  t     | t Value            | Pr >  t |
| Supervised exercise | 260.154057                  | 23.500780      | <.0001      | 6.67               | <.0001  |
| Control             | 39.956322                   | 23.201394      | 0.0870      |                    |         |

| group2              | ch_t_dist_meter60<br>LSMEAN | 95% Confidence Limits |            |
|---------------------|-----------------------------|-----------------------|------------|
| Supervised exercise | 260.154057                  | 213.728548            | 306.579567 |
| Control             | 39.956322                   | -5.877756             | 85.790400  |

| Least Squares Means for Effect group2 |   |                          |                                               |            |
|---------------------------------------|---|--------------------------|-----------------------------------------------|------------|
| i                                     | j | Difference Between Means | 95% Confidence Limits for LSMean(i)-LSMean(j) |            |
| 1                                     | 2 | 220.197735               | 154.959015                                    | 285.436455 |

Adjusted IPD

The GLM Procedure  
Least Squares Means

| group2              | ch_t_dist_meter60<br>LSMEAN | Standard<br>Error | H0:LSMEAN=0 | H0:LSMean1=LSMean2 |         |
|---------------------|-----------------------------|-------------------|-------------|--------------------|---------|
|                     |                             |                   | Pr >  t     | t Value            | Pr >  t |
| Supervised exercise | 217.645000                  | 33.233450         | <.0001      | 6.10               | <.0001  |
| Control             | 14.284411                   | 33.672480         | 0.6720      |                    |         |

| group2              | ch_t_dist_meter60<br>LSMEAN | 95% Confidence Limits |            |
|---------------------|-----------------------------|-----------------------|------------|
| Supervised exercise | 217.645000                  | 151.967949            | 283.322051 |
| Control             | 14.284411                   | -52.260266            | 80.829088  |

| Least Squares Means for Effect group2 |   |                          |                                               |            |
|---------------------------------------|---|--------------------------|-----------------------------------------------|------------|
| i                                     | j | Difference Between Means | 95% Confidence Limits for LSMean(i)-LSMean(j) |            |
| 1                                     | 2 | 203.360588               | 137.467755                                    | 269.253422 |

\*\*TELEX;

Group mean and stddev

The MEANS Procedure

| Analysis Variable : ch_t_dist_meter60 |       |    |        |         |
|---------------------------------------|-------|----|--------|---------|
| group2                                | N Obs | N  | Mean   | Std Dev |
| Control                               | 46    | 36 | 81.93  | 220.66  |
| Supervised exercise                   | 44    | 32 | 203.29 | 205.45  |

Unadjusted

The GLM Procedure

Least Squares Means

| group2              | ch_t_dist_meter60<br>LSMEAN | Standard<br>Error | H0:LSMEAN=0 | H0:LSMean1=LSMean2 |         |
|---------------------|-----------------------------|-------------------|-------------|--------------------|---------|
|                     |                             |                   | Pr >  t     | t Value            | Pr >  t |
| Supervised exercise | 203.291440                  | 37.768603         | <.0001      | 2.34               | 0.0224  |
| Control             | 81.932498                   | 35.608580         | 0.0246      |                    |         |

| group2              | ch_t_dist_meter60<br>LSMEAN | 95% Confidence Limits |            |
|---------------------|-----------------------------|-----------------------|------------|
| Supervised exercise | 203.291440                  | 127.883991            | 278.698889 |
| Control             | 81.932498                   | 10.837673             | 153.027322 |

| Least Squares Means for Effect group2 |   |                          |                                               |            |
|---------------------------------------|---|--------------------------|-----------------------------------------------|------------|
| i                                     | j | Difference Between Means | 95% Confidence Limits for LSMean(i)-LSMean(j) |            |
| 1                                     | 2 | 121.358942               | 17.721317                                     | 224.996568 |

Adjusted IPD

The GLM Procedure  
Least Squares Means

| group2              | ch_t_dist_meter60<br>LSMEAN | Standard<br>Error | H0:LSMEAN=0 | H0:LSMean1=LSMean2 |         |
|---------------------|-----------------------------|-------------------|-------------|--------------------|---------|
|                     |                             |                   | Pr >  t     | t Value            | Pr >  t |
| Supervised exercise | 146.035452                  | 67.254660         | 0.0339      | 2.09               | 0.0413  |
| Control             | 28.920878                   | 61.459789         | 0.6397      |                    |         |

| group2              | ch_t_dist_meter60<br>LSMEAN | 95% Confidence Limits |            |
|---------------------|-----------------------------|-----------------------|------------|
| Supervised exercise | 146.035452                  | 11.459189             | 280.611715 |
| Control             | 28.920878                   | -94.059875            | 151.901631 |

| Least Squares Means for Effect group2 |   |                          |                                               |            |
|---------------------------------------|---|--------------------------|-----------------------------------------------|------------|
| i                                     | j | Difference Between Means | 95% Confidence Limits for LSMean(i)-LSMean(j) |            |
| 1                                     | 2 | 117.114574               | 4.762297                                      | 229.466850 |

| Least Squares Means for Effect group2 |   |                          |                                               |            |
|---------------------------------------|---|--------------------------|-----------------------------------------------|------------|
| i                                     | j | Difference Between Means | 95% Confidence Limits for LSMean(i)-LSMean(j) |            |
| 1                                     | 2 | 121.358942               | 17.721317                                     | 224.996568 |

\*\*Supervised exercise studies combined;

Unadjusted

The GLM Procedure  
Least Squares Means

| group2              | ch_t_dist_meter60<br>LSMEAN | Standard<br>Error | H0:LSMEAN=0 | H0:LSMean1=LSMean2 |         |
|---------------------|-----------------------------|-------------------|-------------|--------------------|---------|
|                     |                             |                   | Pr >  t     | t Value            | Pr >  t |
| Supervised exercise | 234.368505                  | 16.418598         | <.0001      | 8.38               | <.0001  |
| Control             | 46.339189                   | 16.273923         | 0.0047      |                    |         |

| group2              | ch_t_dist_meter60<br>LSMEAN | 95% Confidence Limits |            |
|---------------------|-----------------------------|-----------------------|------------|
| Supervised exercise | 234.368505                  | 202.063329            | 266.673682 |
| Control             | 46.339189                   | 14.318675             | 78.359703  |

| Least Squares Means for Effect group2 |   |                          |                                               |            |
|---------------------------------------|---|--------------------------|-----------------------------------------------|------------|
| i                                     | j | Difference Between Means | 95% Confidence Limits for LSMean(i)-LSMean(j) |            |
| 1                                     | 2 | 188.029317               | 143.866442                                    | 232.192191 |

Adjusted IPD

The GLM Procedure  
Least Squares Means

| group2              | ch_t_dist_meter60<br>LSMEAN | Standard<br>Error | H0:LSMEAN=0 | H0:LSMean1=LSMean2 |         |
|---------------------|-----------------------------|-------------------|-------------|--------------------|---------|
|                     |                             |                   | Pr >  t     | t Value            | Pr >  t |
| Supervised exercise | 212.161062                  | 23.978051         | <.0001      | 8.25               | <.0001  |
| Control             | 26.000442                   | 22.837839         | 0.2558      |                    |         |

| group2              | ch_t_dist_meter60<br>LSMEAN | 95% Confidence Limits |            |
|---------------------|-----------------------------|-----------------------|------------|
| Supervised exercise | 212.161062                  | 164.975849            | 259.346275 |
| Control             | 26.000442                   | -18.941005            | 70.941889  |

| Least Squares Means for Effect group2 |   |                          |                                               |            |
|---------------------------------------|---|--------------------------|-----------------------------------------------|------------|
| i                                     | j | Difference Between Means | 95% Confidence Limits for LSMean(i)-LSMean(j) |            |
| 1                                     | 2 | 186.160620               | 141.771092                                    | 230.550148 |

\*\*pain-free treadmill walking distance;

\*\*SILC;

Group mean and stddev

The MEANS Procedure

| Analysis Variable : ch_on_dist_meter60 |       |    |        |         |
|----------------------------------------|-------|----|--------|---------|
| group2                                 | N Obs | N  | Mean   | Std Dev |
| Control                                | 53    | 44 | 58.84  | 146.45  |
| Supervised exercise                    | 51    | 48 | 192.03 | 209.67  |

Unadjusted

The GLM Procedure  
Least Squares Means

| group2              | ch_on_dist_meter60<br>LSMEAN | Standard<br>Error | H0:LSMEAN=0 | H0:LSMean1=LSMean2 |         |
|---------------------|------------------------------|-------------------|-------------|--------------------|---------|
|                     |                              |                   | Pr >  t     | t Value            | Pr >  t |
| Supervised exercise | 192.031143                   | 26.301548         | <.0001      | 3.50               | 0.0007  |
| Control             | 58.836414                    | 27.471070         | 0.0349      |                    |         |

| group2              | ch_on_dist_meter60<br>LSMEAN | 95% Confidence Limits |            |
|---------------------|------------------------------|-----------------------|------------|
| Supervised exercise | 192.031143                   | 139.778528            | 244.283758 |
| Control             | 58.836414                    | 4.260337              | 113.412490 |

Least Squares Means for Effect group2

| i | j | Difference Between<br>Means | 95% Confidence Limits for LSMean(i)-LSMean(j) |            |
|---|---|-----------------------------|-----------------------------------------------|------------|
| 1 | 2 | 133.194729                  | 57.637573                                     | 208.751885 |

Adjusted IPD

The GLM Procedure  
Least Squares Means

| group2              | ch_on_dist_meter60<br>LSMEAN | Standard<br>Error | H0:LSMEAN=0 | H0:LSMean1=LSMean2 |         |
|---------------------|------------------------------|-------------------|-------------|--------------------|---------|
|                     |                              |                   | Pr >  t     | t Value            | Pr >  t |
| Supervised exercise | 102.798545                   | 41.202466         | 0.0147      | 3.53               | 0.0007  |

| group2  | ch_on_dist_meter60<br>LSMEAN | Standard<br>Error | H0:LSMEAN=0 | H0:LSMean1=LSMean2 |         |
|---------|------------------------------|-------------------|-------------|--------------------|---------|
|         |                              |                   | Pr >  t     | t Value            | Pr >  t |
| Control | -31.139252                   | 38.850983         | 0.4252      |                    |         |

| group2              | ch_on_dist_meter60<br>LSMEAN | 95% Confidence Limits |            |
|---------------------|------------------------------|-----------------------|------------|
| Supervised exercise | 102.798545                   | 20.803024             | 184.794066 |
| Control             | -31.139252                   | -108.455172           | 46.176668  |

| Least Squares Means for Effect group2 |   |                          |                                               |            |
|---------------------------------------|---|--------------------------|-----------------------------------------------|------------|
| i                                     | j | Difference Between Means | 95% Confidence Limits for LSMean(i)-LSMean(j) |            |
| 1                                     | 2 | 133.937796               | 58.405758                                     | 209.469835 |

\*\*PROPEL;

Group mean and stddev

The MEANS Procedure

| Analysis Variable : ch_on_dist_meter60 |       |    |        |         |
|----------------------------------------|-------|----|--------|---------|
| group2                                 | N Obs | N  | Mean   | Std Dev |
| Control                                | 89    | 79 | 53.51  | 160.68  |
| Supervised exercise                    | 87    | 77 | 154.91 | 194.45  |

Unadjusted

The GLM Procedure  
Least Squares Means

| group2              | ch_on_dist_meter60<br>LSMEAN | Standard<br>Error | H0:LSMEAN=0 | H0:LSMean1=LSMean2 |         |
|---------------------|------------------------------|-------------------|-------------|--------------------|---------|
|                     |                              |                   | Pr >  t     | t Value            | Pr >  t |
| Supervised exercise | 154.908069                   | 20.301686         | <.0001      | 3.55               | 0.0005  |
| Control             | 53.511820                    | 20.043055         | 0.0084      |                    |         |

| group2              | ch_on_dist_meter60<br>LSMEAN | 95% Confidence Limits |            |
|---------------------|------------------------------|-----------------------|------------|
| Supervised exercise | 154.908069                   | 114.802331            | 195.013807 |
| Control             | 53.511820                    | 13.917004             | 93.106636  |

| Least Squares Means for Effect group2 |   |                          |                                               |            |
|---------------------------------------|---|--------------------------|-----------------------------------------------|------------|
| i                                     | j | Difference Between Means | 95% Confidence Limits for LSMean(i)-LSMean(j) |            |
| 1                                     | 2 | 101.396249               | 45.038289                                     | 157.754209 |

Adjusted IPD

The GLM Procedure  
Least Squares Means

| group2              | ch_on_dist_meter60<br>LSMEAN | Standard<br>Error | H0:LSMEAN=0 | H0:LSMean1=LSMean2 |         |
|---------------------|------------------------------|-------------------|-------------|--------------------|---------|
|                     |                              |                   | Pr >  t     | t Value            | Pr >  t |
| Supervised exercise | 142.635733                   | 27.549988         | <.0001      | 3.88               | 0.0002  |
| Control             | 34.952864                    | 28.208949         | 0.2173      |                    |         |

| group2              | ch_on_dist_meter60<br>LSMEAN | 95% Confidence Limits |            |
|---------------------|------------------------------|-----------------------|------------|
| Supervised exercise | 142.635733                   | 88.190530             | 197.080937 |
| Control             | 34.952864                    | -20.794600            | 90.700328  |

| Least Squares Means for Effect group2 |   |                          |                                               |            |
|---------------------------------------|---|--------------------------|-----------------------------------------------|------------|
| i                                     | j | Difference Between Means | 95% Confidence Limits for LSMean(i)-LSMean(j) |            |
| 1                                     | 2 | 107.682869               | 52.871827                                     | 162.493912 |

\*\*TELEX;

Group mean and stddev

The MEANS Procedure

| Analysis Variable : ch_on_dist_meter60 |       |    |        |         |
|----------------------------------------|-------|----|--------|---------|
| group2                                 | N Obs | N  | Mean   | Std Dev |
| Control                                | 46    | 36 | 118.42 | 282.93  |
| Supervised exercise                    | 44    | 32 | 176.96 | 238.75  |

Unadjusted

The GLM Procedure  
Least Squares Means



| group2              | ch_on_dist_meter60<br>LSMEAN | Standard<br>Error | H0:LSMEAN=0 | H0:LSMean1=LSMean2 |         |
|---------------------|------------------------------|-------------------|-------------|--------------------|---------|
|                     |                              |                   | Pr >  t     | t Value            | Pr >  t |
| Supervised exercise | 176.957990                   | 46.511273         | 0.0003      | 0.92               | 0.3631  |
| Control             | 118.415929                   | 43.851249         | 0.0088      |                    |         |

| group2              | ch_on_dist_meter60<br>LSMEAN | 95% Confidence Limits |            |
|---------------------|------------------------------|-----------------------|------------|
| Supervised exercise | 176.957990                   | 84.095237             | 269.820743 |
| Control             | 118.415929                   | 30.864086             | 205.967772 |

| Least Squares Means for Effect group2 |   |                          |                                               |            |
|---------------------------------------|---|--------------------------|-----------------------------------------------|------------|
| i                                     | j | Difference Between Means | 95% Confidence Limits for LSMean(i)-LSMean(j) |            |
| 1                                     | 2 | 58.542061                | -69.085585                                    | 186.169707 |

Adjusted IPD

The GLM Procedure  
Least Squares Means

| group2              | ch_on_dist_meter60<br>LSMEAN | Standard<br>Error | H0:LSMEAN=0 | H0:LSMean1=LSMean2 |         |
|---------------------|------------------------------|-------------------|-------------|--------------------|---------|
|                     |                              |                   | Pr >  t     | t Value            | Pr >  t |
| Supervised exercise | 116.422152                   | 77.313143         | 0.1374      | 0.62               | 0.5358  |
| Control             | 75.812735                    | 71.104830         | 0.2907      |                    |         |

| group2              | ch_on_dist_meter60<br>LSMEAN | 95% Confidence Limits |            |
|---------------------|------------------------------|-----------------------|------------|
| Supervised exercise | 116.422152                   | -38.281089            | 271.125393 |
| Control             | 75.812735                    | -66.467702            | 218.093172 |

| Least Squares Means for Effect group2 |   |                          |                                               |            |
|---------------------------------------|---|--------------------------|-----------------------------------------------|------------|
| i                                     | j | Difference Between Means | 95% Confidence Limits for LSMean(i)-LSMean(j) |            |
| 1                                     | 2 | 40.609417                | -89.866942                                    | 171.085777 |

\*\*Supervised exercise studies combined;

Unadjusted

The GLM Procedure  
Least Squares Means

| group2              | ch_on_dist_meter60<br>LSMEAN | Standard<br>Error | H0:LSMEAN=0 | H0:LSMean1=LSMean2 |         |
|---------------------|------------------------------|-------------------|-------------|--------------------|---------|
|                     |                              |                   | Pr >  t     | t Value            | Pr >  t |
| Supervised exercise | 177.151056                   | 16.483949         | <.0001      | 4.50               | <.0001  |
| Control             | 75.704331                    | 16.338698         | <.0001      |                    |         |

| group2              | ch_on_dist_meter60<br>LSMEAN | 95% Confidence Limits |            |
|---------------------|------------------------------|-----------------------|------------|
| Supervised exercise | 177.151056                   | 144.717296            | 209.584817 |
| Control             | 75.704331                    | 43.556367             | 107.852296 |

| Least Squares Means for Effect group2 |   |                             |                                               |            |
|---------------------------------------|---|-----------------------------|-----------------------------------------------|------------|
| i                                     | j | Difference Between<br>Means | 95% Confidence Limits for LSMean(i)-LSMean(j) |            |
| 1                                     | 2 | 101.446725                  | 57.108070                                     | 145.785380 |

Adjusted IPD

The GLM Procedure  
Least Squares Means

| group2              | ch_on_dist_meter60<br>LSMEAN | Standard<br>Error | H0:LSMEAN=0 | H0:LSMean1=LSMean2 |         |
|---------------------|------------------------------|-------------------|-------------|--------------------|---------|
|                     |                              |                   | Pr >  t     | t Value            | Pr >  t |
| Supervised exercise | 147.835788                   | 23.923366         | <.0001      | 4.41               | <.0001  |
| Control             | 48.794695                    | 22.766929         | 0.0329      |                    |         |

| group2              | ch_on_dist_meter60<br>LSMEAN | 95% Confidence Limits |            |
|---------------------|------------------------------|-----------------------|------------|
| Supervised exercise | 147.835788                   | 100.758186            | 194.913390 |
| Control             | 48.794695                    | 3.992788              | 93.596601  |

| Least Squares Means for Effect group2 |   |                             |                                               |            |
|---------------------------------------|---|-----------------------------|-----------------------------------------------|------------|
| i                                     | j | Difference Between<br>Means | 95% Confidence Limits for LSMean(i)-LSMean(j) |            |
| 1                                     | 2 | 99.041093                   | 54.829091                                     | 143.253096 |

\*\*WIQ distance score;

\*\*SILC;

Group mean and stddev

The MEANS Procedure

| Analysis Variable : ch_distscr60 |       |    |       |         |
|----------------------------------|-------|----|-------|---------|
| group2                           | N Obs | N  | Mean  | Std Dev |
| Control                          | 53    | 34 | 4.19  | 18.25   |
| Supervised exercise              | 51    | 41 | 17.97 | 27.47   |

Unadjusted

The GLM Procedure  
Least Squares Means

| group2              | ch_distscr60 LSMEAN | Standard Error | H0:LSMEAN=0 | H0:LSMean1=LSMean2 |         |
|---------------------|---------------------|----------------|-------------|--------------------|---------|
|                     |                     |                | Pr >  t     | t Value            | Pr >  t |
| Supervised exercise | 17.9739468          | 3.7091512      | <.0001      | 2.50               | 0.0146  |
| Control             | 4.1861631           | 4.0731182      | 0.3075      |                    |         |

| group2              | ch_distscr60 LSMEAN | 95% Confidence Limits |           |
|---------------------|---------------------|-----------------------|-----------|
| Supervised exercise | 17.973947           | 10.581619             | 25.366275 |
| Control             | 4.186163            | -3.931550             | 12.303876 |

| Least Squares Means for Effect group2 |   |                          |                                               |           |
|---------------------------------------|---|--------------------------|-----------------------------------------------|-----------|
| i                                     | j | Difference Between Means | 95% Confidence Limits for LSMean(i)-LSMean(j) |           |
| 1                                     | 2 | 13.787784                | 2.808541                                      | 24.767026 |

Adjusted IPD

The GLM Procedure  
Least Squares Means

| group2              | ch_distscr60 LSMEAN | Standard Error | H0:LSMEAN=0 | H0:LSMean1=LSMean2 |         |
|---------------------|---------------------|----------------|-------------|--------------------|---------|
|                     |                     |                | Pr >  t     | t Value            | Pr >  t |
| Supervised exercise | 14.9796420          | 5.9962449      | 0.0151      | 2.37               | 0.0210  |
| Control             | 1.8698434           | 6.1843878      | 0.7634      |                    |         |

| group2              | ch_distscr60 LSMEAN | 95% Confidence Limits |           |
|---------------------|---------------------|-----------------------|-----------|
| Supervised exercise | 14.979642           | 3.000766              | 26.958518 |
| Control             | 1.869843            | -10.484892            | 14.224578 |

| Least Squares Means for Effect group2 |   |                          |                                               |           |
|---------------------------------------|---|--------------------------|-----------------------------------------------|-----------|
| i                                     | j | Difference Between Means | 95% Confidence Limits for LSMean(i)-LSMean(j) |           |
| 1                                     | 2 | 13.109799                | 2.042448                                      | 24.177149 |

\*\*PROPEL;

Group mean and stddev

The MEANS Procedure

| Analysis Variable : ch_distscr60 |       |    |      |         |
|----------------------------------|-------|----|------|---------|
| group2                           | N Obs | N  | Mean | Std Dev |
| Control                          | 89    | 80 | 5.71 | 26.46   |
| Supervised exercise              | 87    | 81 | 7.61 | 25.01   |

Unadjusted

The GLM Procedure  
Least Squares Means

| group2              | ch_distscr60 LSMEAN | Standard Error | H0:LSMEAN=0 | H0:LSMean1=LSMean2 |         |
|---------------------|---------------------|----------------|-------------|--------------------|---------|
|                     |                     |                | Pr >  t     | t Value            | Pr >  t |
| Supervised exercise | 7.60820006          | 2.85955215     | 0.0086      | 0.47               | 0.6410  |
| Control             | 5.71289062          | 2.87736884     | 0.0488      |                    |         |

| group2              | ch_distscr60 LSMEAN | 95% Confidence Limits |           |
|---------------------|---------------------|-----------------------|-----------|
| Supervised exercise | 7.608200            | 1.960595              | 13.255805 |
| Control             | 5.712891            | 0.030098              | 11.395683 |

| Least Squares Means for Effect group2 |   |                          |                                               |          |
|---------------------------------------|---|--------------------------|-----------------------------------------------|----------|
| i                                     | j | Difference Between Means | 95% Confidence Limits for LSMean(i)-LSMean(j) |          |
| 1                                     | 2 | 1.895309                 | -6.116530                                     | 9.907149 |

Adjusted IPD

The GLM Procedure  
Least Squares Means

| group2              | ch_distscr60 LSMEAN | Standard Error | H0:LSMEAN=0 | H0:LSMean1=LSMean2 |         |
|---------------------|---------------------|----------------|-------------|--------------------|---------|
|                     |                     |                | Pr >  t     | t Value            | Pr >  t |
| Supervised exercise | 6.96951036          | 4.05784531     | 0.0879      | 0.87               | 0.3848  |
| Control             | 3.49299552          | 4.18780650     | 0.4055      |                    |         |

| group2              | ch_distscr60 LSMEAN | 95% Confidence Limits |           |
|---------------------|---------------------|-----------------------|-----------|
| Supervised exercise | 6.969510            | -1.047550             | 14.986571 |
| Control             | 3.492996            | -4.780828             | 11.766819 |

| Least Squares Means for Effect group2 |   |                          |                                               |
|---------------------------------------|---|--------------------------|-----------------------------------------------|
| i                                     | j | Difference Between Means | 95% Confidence Limits for LSMean(i)-LSMean(j) |
| 1                                     | 2 | 3.476515                 | -4.404469 11.357499                           |

\*\*TELEX;

Group mean and stddev

The MEANS Procedure

| Analysis Variable : ch_distscr60 |       |    |      |         |
|----------------------------------|-------|----|------|---------|
| group2                           | N Obs | N  | Mean | Std Dev |
| Control                          | 46    | 40 | 2.12 | 22.14   |
| Supervised exercise              | 44    | 40 | 7.11 | 22.17   |

Unadjusted

The GLM Procedure  
Least Squares Means

| group2              | ch_distscr60 LSMEAN | Standard Error | H0:LSMEAN=0 | H0:LSMean1=LSMean2 |         |
|---------------------|---------------------|----------------|-------------|--------------------|---------|
|                     |                     |                | Pr >  t     | t Value            | Pr >  t |
| Supervised exercise | 7.10759943          | 3.50301841     | 0.0459      | 1.01               | 0.3172  |
| Control             | 2.12002841          | 3.50301841     | 0.5468      |                    |         |

| group2              | ch_distscr60 LSMEAN | 95% Confidence Limits |           |
|---------------------|---------------------|-----------------------|-----------|
| Supervised exercise | 7.107599            | 0.133625              | 14.081573 |
| Control             | 2.120028            | -4.853946             | 9.094002  |

| Least Squares Means for Effect group2 |   |                          |                                               |           |
|---------------------------------------|---|--------------------------|-----------------------------------------------|-----------|
| i                                     | j | Difference Between Means | 95% Confidence Limits for LSMean(i)-LSMean(j) |           |
| 1                                     | 2 | 4.987571                 | -4.875118                                     | 14.850260 |

Adjusted IPD

The GLM Procedure  
Least Squares Means

| group2              | ch_distscr60 LSMEAN | Standard Error | H0:LSMEAN=0 | H0:LSMean1=LSMean2 |         |
|---------------------|---------------------|----------------|-------------|--------------------|---------|
|                     |                     |                | Pr >  t     | t Value            | Pr >  t |
| Supervised exercise | 2.36965789          | 5.97144340     | 0.6927      | 0.58               | 0.5606  |
| Control             | -0.54457782         | 5.34757121     | 0.9192      |                    |         |

| group2              | ch_distscr60 LSMEAN | 95% Confidence Limits |           |
|---------------------|---------------------|-----------------------|-----------|
| Supervised exercise | 2.369658            | -9.537062             | 14.276378 |
| Control             | -0.544578           | -11.207332            | 10.118176 |

| Least Squares Means for Effect group2 |   |                          |                                               |           |
|---------------------------------------|---|--------------------------|-----------------------------------------------|-----------|
| i                                     | j | Difference Between Means | 95% Confidence Limits for LSMean(i)-LSMean(j) |           |
| 1                                     | 2 | 2.914236                 | -7.023106                                     | 12.851578 |

\*\*Supervised exercise studies combined;

Unadjusted

The GLM Procedure  
Least Squares Means

| group2              | ch_distscr60 LSMEAN | Standard Error | H0:LSMEAN=0 | H0:LSMean1=LSMean2 |         |
|---------------------|---------------------|----------------|-------------|--------------------|---------|
|                     |                     |                | Pr >  t     | t Value            | Pr >  t |
| Supervised exercise | 10.3187538          | 1.9753143      | <.0001      | 1.99               | 0.0474  |
| Control             | 4.8351108           | 2.0380306      | 0.0183      |                    |         |

| group2              | ch_distscr60 LSMEAN | 95% Confidence Limits |           |
|---------------------|---------------------|-----------------------|-----------|
| Supervised exercise | 10.318754           | 6.432132              | 14.205375 |
| Control             | 4.835111            | 0.825089              | 8.845133  |

| Least Squares Means for Effect group2 |   |                          |                                               |           |
|---------------------------------------|---|--------------------------|-----------------------------------------------|-----------|
| i                                     | j | Difference Between Means | 95% Confidence Limits for LSMean(i)-LSMean(j) |           |
| 1                                     | 2 | 5.483643                 | 0.064490                                      | 10.902797 |

Adjusted IPD

The GLM Procedure  
Least Squares Means

| group2              | ch_distscr60 LSMEAN | Standard Error | H0:LSMEAN=0 | H0:LSMean1=LSMean2 |         |
|---------------------|---------------------|----------------|-------------|--------------------|---------|
|                     |                     |                | Pr >  t     | t Value            | Pr >  t |
| Supervised exercise | 9.15566127          | 2.87717319     | 0.0016      | 1.98               | 0.0488  |
| Control             | 3.88670781          | 2.80360442     | 0.1667      |                    |         |

| group2              | ch_distscr60 LSMEAN | 95% Confidence Limits |           |
|---------------------|---------------------|-----------------------|-----------|
| Supervised exercise | 9.155661            | 3.493891              | 14.817432 |
| Control             | 3.886708            | -1.630293             | 9.403708  |

| Least Squares Means for Effect group2 |   |                          |                                               |           |
|---------------------------------------|---|--------------------------|-----------------------------------------------|-----------|
| i                                     | j | Difference Between Means | 95% Confidence Limits for LSMean(i)-LSMean(j) |           |
| 1                                     | 2 | 5.268953                 | 0.028003                                      | 10.509904 |

\*\*WIQ speed score;

\*\*SILC;

Group mean and stddev

The MEANS Procedure

| Analysis Variable : ch_speedscr60 |       |    |      |         |
|-----------------------------------|-------|----|------|---------|
| group2                            | N Obs | N  | Mean | Std Dev |
| Control                           | 53    | 36 | 7.25 | 22.10   |
| Supervised exercise               | 51    | 44 | 8.67 | 23.48   |

Unadjusted

The GLM Procedure  
Least Squares Means

| group2              | ch_speedscr60 LSMEAN | Standard Error | H0:LSMEAN=0 |         | H0:LSMean1=LSMean2 |  |
|---------------------|----------------------|----------------|-------------|---------|--------------------|--|
|                     |                      |                | Pr >  t     | t Value | Pr >  t            |  |
| Supervised exercise | 8.67094862           | 3.44730790     | 0.0139      | 0.28    | 0.7824             |  |
| Control             | 7.24637681           | 3.81114228     | 0.0609      |         |                    |  |

| group2              | ch_speedscr60 LSMEAN | 95% Confidence Limits |           |
|---------------------|----------------------|-----------------------|-----------|
| Supervised exercise | 8.670949             | 1.807886              | 15.534011 |
| Control             | 7.246377             | -0.341025             | 14.833778 |

| Least Squares Means for Effect group2 |   |                          |                                               |           |
|---------------------------------------|---|--------------------------|-----------------------------------------------|-----------|
| i                                     | j | Difference Between Means | 95% Confidence Limits for LSMean(i)-LSMean(j) |           |
| 1                                     | 2 | 1.424572                 | -8.806278                                     | 11.655422 |

Adjusted IPD

The GLM Procedure  
Least Squares Means

| group2              | ch_speedscr60 LSMEAN | Standard Error | H0:LSMEAN=0 |         | H0:LSMean1=LSMean2 |  |
|---------------------|----------------------|----------------|-------------|---------|--------------------|--|
|                     |                      |                | Pr >  t     | t Value | Pr >  t            |  |
| Supervised exercise | 9.13487543           | 5.49632743     | 0.1011      | 0.79    | 0.4325             |  |
| Control             | 4.91099898           | 5.54802127     | 0.3792      |         |                    |  |

| group2              | ch_speedscr60 LSMEAN | 95% Confidence Limits |           |
|---------------------|----------------------|-----------------------|-----------|
| Supervised exercise | 9.134875             | -1.832875             | 20.102626 |
| Control             | 4.910999             | -6.159905             | 15.981903 |

| Least Squares Means for Effect group2 |   |                          |                                               |           |
|---------------------------------------|---|--------------------------|-----------------------------------------------|-----------|
| i                                     | j | Difference Between Means | 95% Confidence Limits for LSMean(i)-LSMean(j) |           |
| 1                                     | 2 | 4.223876                 | -6.451664                                     | 14.899416 |

\*\*PROPEL;



Group mean and stddev

The MEANS Procedure

| Analysis Variable : ch_speedscr60 |       |    |      |         |
|-----------------------------------|-------|----|------|---------|
| group2                            | N Obs | N  | Mean | Std Dev |
| Control                           | 89    | 82 | 3.74 | 25.46   |
| Supervised exercise               | 87    | 81 | 7.76 | 23.13   |

Unadjusted

The GLM Procedure  
Least Squares Means

| group2              | ch_speedscr60 LSMEAN | Standard Error | H0:LSMEAN=0 | H0:LSMean1=LSMean2 |         |
|---------------------|----------------------|----------------|-------------|--------------------|---------|
|                     |                      |                | Pr >  t     | t Value            | Pr >  t |
| Supervised exercise | 7.75630703           | 2.70344372     | 0.0047      | 1.05               | 0.2934  |
| Control             | 3.73806999           | 2.68690874     | 0.1661      |                    |         |

| group2              | ch_speedscr60 LSMEAN | 95% Confidence Limits |           |
|---------------------|----------------------|-----------------------|-----------|
| Supervised exercise | 7.756307             | 2.417524              | 13.095090 |
| Control             | 3.738070             | -1.568059             | 9.044199  |

| Least Squares Means for Effect group2 |   |                          |                                               |           |
|---------------------------------------|---|--------------------------|-----------------------------------------------|-----------|
| i                                     | j | Difference Between Means | 95% Confidence Limits for LSMean(i)-LSMean(j) |           |
| 1                                     | 2 | 4.018237                 | -3.508888                                     | 11.545362 |

Adjusted IPD

The GLM Procedure  
Least Squares Means

| group2              | ch_speedscr60 LSMEAN | Standard Error | H0:LSMEAN=0 | H0:LSMean1=LSMean2 |         |
|---------------------|----------------------|----------------|-------------|--------------------|---------|
|                     |                      |                | Pr >  t     | t Value            | Pr >  t |
| Supervised exercise | 5.94523474           | 3.62873399     | 0.1034      | 1.16               | 0.2493  |
| Control             | 1.81904478           | 3.70573496     | 0.6242      |                    |         |

| group2              | ch_speedscr60 LSMEAN | 95% Confidence Limits |           |
|---------------------|----------------------|-----------------------|-----------|
| Supervised exercise | 5.945235             | -1.223286             | 13.113755 |
| Control             | 1.819045             | -5.501590             | 9.139680  |

| Least Squares Means for Effect group2 |   |                          |                                               |           |
|---------------------------------------|---|--------------------------|-----------------------------------------------|-----------|
| i                                     | j | Difference Between Means | 95% Confidence Limits for LSMean(i)-LSMean(j) |           |
| 1                                     | 2 | 4.126190                 | -2.921802                                     | 11.174182 |

\*\*TELEX;

Group mean and stddev

The MEANS Procedure

| Analysis Variable : ch_speedscr60 |       |    |      |         |
|-----------------------------------|-------|----|------|---------|
| group2                            | N Obs | N  | Mean | Std Dev |
| Control                           | 46    | 40 | 2.09 | 19.11   |
| Supervised exercise               | 44    | 40 | 3.02 | 22.16   |

Unadjusted

The GLM Procedure  
Least Squares Means

| group2              | ch_speedscr60 LSMEAN | Standard Error | H0:LSMEAN=0 | H0:LSMean1=LSMean2 |         |
|---------------------|----------------------|----------------|-------------|--------------------|---------|
|                     |                      |                | Pr >  t     | t Value            | Pr >  t |
| Supervised exercise | 3.01630435           | 3.27163716     | 0.3594      | 0.20               | 0.8422  |
| Control             | 2.09239130           | 3.27163716     | 0.5243      |                    |         |

| group2              | ch_speedscr60 LSMEAN | 95% Confidence Limits |          |
|---------------------|----------------------|-----------------------|----------|
| Supervised exercise | 3.016304             | -3.497025             | 9.529634 |
| Control             | 2.092391             | -4.420938             | 8.605721 |

| Least Squares Means for Effect group2 |   |                          |                                               |           |
|---------------------------------------|---|--------------------------|-----------------------------------------------|-----------|
| i                                     | j | Difference Between Means | 95% Confidence Limits for LSMean(i)-LSMean(j) |           |
| 1                                     | 2 | 0.923913                 | -8.287326                                     | 10.135152 |

Adjusted IPD

The GLM Procedure  
Least Squares Means

| group2              | ch_speedscr60 LSMEAN | Standard Error | H0:LSMEAN=0 | H0:LSMean1=LSMean2 |         |
|---------------------|----------------------|----------------|-------------|--------------------|---------|
|                     |                      |                | Pr >  t     | t Value            | Pr >  t |
| Supervised exercise | 2.69315360           | 5.32595935     | 0.6147      | -0.21              | 0.8341  |
| Control             | 3.63903181           | 4.75121433     | 0.4463      |                    |         |

| group2              | ch_speedscr60 LSMEAN | 95% Confidence Limits |           |
|---------------------|----------------------|-----------------------|-----------|
| Supervised exercise | 2.693154             | -7.926508             | 13.312815 |
| Control             | 3.639032             | -5.834620             | 13.112684 |

| Least Squares Means for Effect group2 |   |                          |                                               |          |
|---------------------------------------|---|--------------------------|-----------------------------------------------|----------|
| i                                     | j | Difference Between Means | 95% Confidence Limits for LSMean(i)-LSMean(j) |          |
| 1                                     | 2 | -0.945878                | -9.916750                                     | 8.024994 |

\*\*Supervised exercise studies combined;

Unadjusted

The GLM Procedure  
Least Squares Means

| group2              | ch_speedscr60 LSMEAN | Standard Error | H0:LSMEAN=0 | H0:LSMean1=LSMean2 |         |
|---------------------|----------------------|----------------|-------------|--------------------|---------|
|                     |                      |                | Pr >  t     | t Value            | Pr >  t |
| Supervised exercise | 6.70501351           | 1.84089490     | 0.0003      | 1.02               | 0.3101  |
| Control             | 4.09265118           | 1.89617610     | 0.0316      |                    |         |

| group2              | ch_speedscr60 LSMEAN | 95% Confidence Limits |           |
|---------------------|----------------------|-----------------------|-----------|
| Supervised exercise | 6.705014             | 3.083185              | 10.326842 |
| Control             | 4.092651             | 0.362060              | 7.823242  |

| Least Squares Means for Effect group2 |   |                          |                                               |          |
|---------------------------------------|---|--------------------------|-----------------------------------------------|----------|
| i                                     | j | Difference Between Means | 95% Confidence Limits for LSMean(i)-LSMean(j) |          |
| 1                                     | 2 | 2.612362                 | -2.443114                                     | 7.667839 |

Adjusted IPD

The GLM Procedure  
Least Squares Means

| group2              | ch_speedscr60 LSMEAN | Standard Error | H0:LSMEAN=0 |         |         |
|---------------------|----------------------|----------------|-------------|---------|---------|
|                     |                      |                | Pr >  t     | t Value | Pr >  t |
| Supervised exercise | 6.12747885           | 2.55467413     | 0.0171      | 1.13    | 0.2601  |
| Control             | 3.42346562           | 2.45745176     | 0.1646      |         |         |

| group2              | ch_speedscr60 LSMEAN | 95% Confidence Limits |           |
|---------------------|----------------------|-----------------------|-----------|
| Supervised exercise | 6.127479             | 1.100721              | 11.154237 |
| Control             | 3.423466             | -1.411991             | 8.258922  |

| Least Squares Means for Effect group2 |   |                          |                                               |          |
|---------------------------------------|---|--------------------------|-----------------------------------------------|----------|
| i                                     | j | Difference Between Means | 95% Confidence Limits for LSMean(i)-LSMean(j) |          |
| 1                                     | 2 | 2.704013                 | -2.012067                                     | 7.420094 |

\*\*WIQ stair-climbing score;

\*\*SILC;

Group mean and stddev

The MEANS Procedure

| Analysis Variable : ch_climbscr60 |       |    |      |         |
|-----------------------------------|-------|----|------|---------|
| group2                            | N Obs | N  | Mean | Std Dev |
| Control                           | 53    | 37 | 1.91 | 19.97   |
| Supervised exercise               | 51    | 42 | 9.42 | 27.14   |

Unadjusted

The GLM Procedure  
Least Squares Means

| group2              | ch_climbscr60 LSMEAN | Standard Error | H0:LSMEAN=0 |         |         |
|---------------------|----------------------|----------------|-------------|---------|---------|
|                     |                      |                | Pr >  t     | t Value | Pr >  t |
| Supervised exercise | 9.42460317           | 3.71242559     | 0.0131      | 1.38    | 0.1702  |
| Control             | 1.91441441           | 3.95531923     | 0.6298      |         |         |

| group2              | ch_climbscr60 LSMEAN | 95% Confidence Limits |           |
|---------------------|----------------------|-----------------------|-----------|
| Supervised exercise | 9.424603             | 2.032219              | 16.816987 |
| Control             | 1.914414             | -5.961632             | 9.790461  |

| Least Squares Means for Effect group2 |   |                          |                                               |           |
|---------------------------------------|---|--------------------------|-----------------------------------------------|-----------|
| i                                     | j | Difference Between Means | 95% Confidence Limits for LSMean(i)-LSMean(j) |           |
| 1                                     | 2 | 7.510189                 | -3.291638                                     | 18.312015 |

Adjusted IPD

The GLM Procedure  
Least Squares Means

| group2              | ch_climbscr60 LSMEAN | Standard Error | H0:LSMEAN=0 | H0:LSMean1=LSMean2 |         |
|---------------------|----------------------|----------------|-------------|--------------------|---------|
|                     |                      |                | Pr >  t     | t Value            | Pr >  t |
| Supervised exercise | 9.87736488           | 5.59454537     | 0.0820      | 1.13               | 0.2622  |
| Control             | 3.88022755           | 5.49335900     | 0.4824      |                    |         |

| group2              | ch_climbscr60 LSMEAN | 95% Confidence Limits |           |
|---------------------|----------------------|-----------------------|-----------|
| Supervised exercise | 9.877365             | -1.289394             | 21.044124 |
| Control             | 3.880228             | -7.084563             | 14.845018 |

| Least Squares Means for Effect group2 |   |                          |                                               |           |
|---------------------------------------|---|--------------------------|-----------------------------------------------|-----------|
| i                                     | j | Difference Between Means | 95% Confidence Limits for LSMean(i)-LSMean(j) |           |
| 1                                     | 2 | 5.997137                 | -4.589669                                     | 16.583944 |

\*\*PROPEL;

Group mean and stddev

The MEANS Procedure

| Analysis Variable : ch_climbscr60 |       |    |      |         |
|-----------------------------------|-------|----|------|---------|
| group2                            | N Obs | N  | Mean | Std Dev |
| Control                           | 89    | 82 | 2.44 | 28.05   |
| Supervised exercise               | 87    | 80 | 4.69 | 25.67   |

Unadjusted

The GLM Procedure  
Least Squares Means

| group2              | ch_climbscr60 LSMEAN | Standard Error | H0:LSMEAN=0 | H0:LSMean1=LSMean2 |         |
|---------------------|----------------------|----------------|-------------|--------------------|---------|
|                     |                      |                | Pr >  t     | t Value            | Pr >  t |
| Supervised exercise | 4.68750000           | 3.00748046     | 0.1211      | 0.53               | 0.5955  |
| Control             | 2.43902439           | 2.97057747     | 0.4128      |                    |         |

| group2              | ch_climbscr60 LSMEAN | 95% Confidence Limits |           |
|---------------------|----------------------|-----------------------|-----------|
| Supervised exercise | 4.687500             | -1.251978             | 10.626978 |
| Control             | 2.439024             | -3.427574             | 8.305622  |

| Least Squares Means for Effect group2 |   |                          |                                               |
|---------------------------------------|---|--------------------------|-----------------------------------------------|
| i                                     | j | Difference Between Means | 95% Confidence Limits for LSMean(i)-LSMean(j) |
| 1                                     | 2 | 2.248476                 | -6.099840 10.596791                           |

Adjusted IPD

The GLM Procedure  
Least Squares Means

| group2              | ch_climbscr60 LSMEAN | Standard Error | H0:LSMEAN=0 | H0:LSMean1=LSMean2 |         |
|---------------------|----------------------|----------------|-------------|--------------------|---------|
|                     |                      |                | Pr >  t     | t Value            | Pr >  t |
| Supervised exercise | -0.39507833          | 3.94044777     | 0.9203      | 1.18               | 0.2415  |
| Control             | -4.99351795          | 4.07223287     | 0.2220      |                    |         |

| group2              | ch_climbscr60 LSMEAN | 95% Confidence Limits |          |
|---------------------|----------------------|-----------------------|----------|
| Supervised exercise | -0.395078            | -8.179789             | 7.389632 |
| Control             | -4.993518            | -13.038582            | 3.051546 |

| Least Squares Means for Effect group2 |   |                          |                                               |
|---------------------------------------|---|--------------------------|-----------------------------------------------|
| i                                     | j | Difference Between Means | 95% Confidence Limits for LSMean(i)-LSMean(j) |
| 1                                     | 2 | 4.598440                 | -3.128050 12.324929                           |

\*\*TELEX;

Group mean and stddev

The MEANS Procedure

| Analysis Variable : ch_climbscr60 |       |    |      |         |
|-----------------------------------|-------|----|------|---------|
| group2                            | N Obs | N  | Mean | Std Dev |
| Control                           | 46    | 40 | 1.77 | 24.87   |
| Supervised exercise               | 44    | 40 | 7.29 | 25.47   |

Unadjusted

The GLM Procedure  
Least Squares Means

| group2              | ch_climbscr60 LSMEAN | Standard Error | H0:LSMEAN=0 | H0:LSMean1=LSMean2 |         |
|---------------------|----------------------|----------------|-------------|--------------------|---------|
|                     |                      |                | Pr >  t     | t Value            | Pr >  t |
| Supervised exercise | 7.2916667            | 3.98039497     | 0.0708      | 0.98               | 0.3297  |
| Control             | 1.77083333           | 3.98039497     | 0.6576      |                    |         |

| group2              | ch_climbscr60 LSMEAN | 95% Confidence Limits |           |
|---------------------|----------------------|-----------------------|-----------|
| Supervised exercise | 7.291667             | -0.632691             | 15.216024 |
| Control             | 1.770833             | -6.153524             | 9.695191  |

| Least Squares Means for Effect group2 |   |                          |                                               |           |
|---------------------------------------|---|--------------------------|-----------------------------------------------|-----------|
| i                                     | j | Difference Between Means | 95% Confidence Limits for LSMean(i)-LSMean(j) |           |
| 1                                     | 2 | 5.520833                 | -5.685901                                     | 16.727567 |

Adjusted IPD

The GLM Procedure  
Least Squares Means

| group2              | ch_climbscr60 LSMEAN | Standard Error | H0:LSMEAN=0 | H0:LSMean1=LSMean2 |         |
|---------------------|----------------------|----------------|-------------|--------------------|---------|
|                     |                      |                | Pr >  t     | t Value            | Pr >  t |
| Supervised exercise | 1.71319020           | 6.39335894     | 0.7895      | 0.55               | 0.5809  |
| Control             | -1.26782209          | 5.77372069     | 0.8268      |                    |         |

| group2              | ch_climbscr60 LSMEAN | 95% Confidence Limits |           |
|---------------------|----------------------|-----------------------|-----------|
| Supervised exercise | 1.713190             | -11.034805            | 14.461186 |
| Control             | -1.267822            | -12.780294            | 10.244650 |

| Least Squares Means for Effect group2 |   |                          |                                               |  |           |
|---------------------------------------|---|--------------------------|-----------------------------------------------|--|-----------|
| i                                     | j | Difference Between Means | 95% Confidence Limits for LSMean(i)-LSMean(j) |  |           |
| 1                                     | 2 | 2.981012                 | -7.737089                                     |  | 13.699113 |

\*\*Supervised exercise studies combined;

Unadjusted

The GLM Procedure  
Least Squares Means

| group2              | ch_climbscr60 LSMEAN | Standard Error | H0:LSMEAN=0 | H0:LSMean1=LSMean2 |         |
|---------------------|----------------------|----------------|-------------|--------------------|---------|
|                     |                      |                | Pr >  t     | t Value            | Pr >  t |
| Supervised exercise | 6.80361934           | 2.07515121     | 0.0012      | 1.51               | 0.1309  |
| Control             | 2.44761153           | 2.10872164     | 0.2466      |                    |         |

| group2              | ch_climbscr60 LSMEAN | 95% Confidence Limits |           |
|---------------------|----------------------|-----------------------|-----------|
| Supervised exercise | 6.803619             | 2.720810              | 10.886429 |
| Control             | 2.447612             | -1.701247             | 6.596470  |

| Least Squares Means for Effect group2 |   |                          |                                               |  |           |
|---------------------------------------|---|--------------------------|-----------------------------------------------|--|-----------|
| i                                     | j | Difference Between Means | 95% Confidence Limits for LSMean(i)-LSMean(j) |  |           |
| 1                                     | 2 | 4.356008                 | -1.302279                                     |  | 10.014294 |

Adjusted IPD

The GLM Procedure  
Least Squares Means

| group2              | ch_climbscr60 LSMEAN | Standard Error | H0:LSMEAN=0 | H0:LSMean1=LSMean2 |         |
|---------------------|----------------------|----------------|-------------|--------------------|---------|
|                     |                      |                | Pr >  t     | t Value            | Pr >  t |
| Supervised exercise | 3.31476034           | 2.81827314     | 0.2404      | 1.51               | 0.1319  |
| Control             | -0.68595012          | 2.70334512     | 0.7999      |                    |         |

| group2              | ch_climbscr60 LSMEAN | 95% Confidence Limits |          |
|---------------------|----------------------|-----------------------|----------|
| Supervised exercise | 3.314760             | -2.230816             | 8.860336 |
| Control             | -0.685950            | -6.005380             | 4.633480 |



| Least Squares Means for Effect group2 |   |                          |                                               |          |
|---------------------------------------|---|--------------------------|-----------------------------------------------|----------|
| i                                     | j | Difference Between Means | 95% Confidence Limits for LSMean(i)-LSMean(j) |          |
| 1                                     | 2 | 4.000710                 | -1.210601                                     | 9.212022 |

#### 4. Supplemental Table 3

##### Illustrative SAS code:

```

%macro ana2(indata=, var=, name=, blv=);
title 'Group mean and stddev';
proc means data = &indata n mean stddev maxdec=2;
class group2;
var &var;
run;

title 'Unadjusted';
proc glm data=&indata;
class group2(ref='Control') %if &indata=sup_con %or &indata=home_con %then
%do; study %end;;
model &var = group2 %if &indata=sup_con %or &indata=home_con %then %do; study
%end;/solution;
lsmeans group2/tdiff pdiff cl STDERR;
ods output "Type III Model ANOVA"=a1 LSMeansCL=a2 LSMeansDiffCL=a3;
run;

title 'Adjusted IPD';
proc glm data=&indata;
class group2(ref='Control') gender aarace(ref='0') cur_smoker0(ref='0')
MI0(ref='0') CHF0(ref='0') %if &indata=sup_con %or &indata=home_con %then
%do; study %end;;
model &var = group2 &blv age gender aarace cur_smoker0 MI0 CHF0 %if
&indata=sup_con %or &indata=home_con %then %do; study %end;/solution;
lsmeans group2/tdiff pdiff cl stderr ;
ods output "Type III Model ANOVA"=b1 LSMeansCL=b2 LSMeansDiffCL=b3;
run;

%mend;

**example: six-minute walk outcome;
%ana2(indata=GOALS, var=ch_dist6min_m60, name=dist6min, blv=dist6min_m0);
%ana2(indata=LITE, var=ch_dist6min_m60, name=dist6min, blv=dist6min_m0);
%ana2(indata=home_con, var=ch_dist6min_m60, name=dist6min, blv=dist6min_m0);

```

##### SAS output results:

\*\*six-minute walk;

\*\*GOALS;

Group mean and stdev

The MEANS Procedure

| Analysis Variable : ch_dist6min_m60 |       |    |        |         |
|-------------------------------------|-------|----|--------|---------|
| group2                              | N Obs | N  | Mean   | Std Dev |
| Control                             | 92    | 85 | -11.69 | 70.62   |
| Home-based exercise                 | 92    | 84 | 42.73  | 69.26   |

Unadjusted

The GLM Procedure  
Least Squares Means

| group2              | ch_dist6min_m60 LSMEAN | Standard Error | H0:LSMEAN=0 | H0:LSMean1=LSMean2 |         |
|---------------------|------------------------|----------------|-------------|--------------------|---------|
|                     |                        |                | Pr >  t     | t Value            | Pr >  t |
| Home-based exercise | 42.7264286             | 7.6316710      | <.0001      | 5.06               | <.0001  |
| Control             | -11.6899765            | 7.5866460      | 0.1252      |                    |         |

| group2              | ch_dist6min_m60 LSMEAN | 95% Confidence Limits |           |
|---------------------|------------------------|-----------------------|-----------|
| Home-based exercise | 42.726429              | 27.659442             | 57.793415 |
| Control             | -11.689976             | -26.668071            | 3.288118  |

| Least Squares Means for Effect group2 |   |                          |                                               |
|---------------------------------------|---|--------------------------|-----------------------------------------------|
| i                                     | j | Difference Between Means | 95% Confidence Limits for LSMean(i)-LSMean(j) |
| 1                                     | 2 | 54.416405                | 33.171231 75.661579                           |

Adjusted IPD

The GLM Procedure  
Least Squares Means

| group2              | ch_dist6min_m60<br>LSMEAN | Standard<br>Error | H0:LSMEAN=0 |         | H0:LSMean1=LSMean2 |  |
|---------------------|---------------------------|-------------------|-------------|---------|--------------------|--|
|                     |                           |                   | Pr >  t     | t Value | Pr >  t            |  |
| Home-based exercise | 36.7303210                | 11.5057889        | 0.0017      | 5.73    | <.0001             |  |
| Control             | -23.2545825               | 11.5027859        | 0.0449      |         |                    |  |

| group2              | ch_dist6min_m60 LSMEAN | 95% Confidence Limits |           |
|---------------------|------------------------|-----------------------|-----------|
| Home-based exercise | 36.730321              | 14.007520             | 59.453121 |
| Control             | -23.254583             | -45.971452            | -0.537713 |

| Least Squares Means for Effect group2 |   |                          |                                               |           |
|---------------------------------------|---|--------------------------|-----------------------------------------------|-----------|
| i                                     | j | Difference Between Means | 95% Confidence Limits for LSMean(i)-LSMean(j) |           |
| 1                                     | 2 | 59.984903                | 39.294635                                     | 80.675172 |

\*\*LITE;

Group mean and stddev

The MEANS Procedure

| Analysis Variable : ch_dist6min_m60 |       |    |        |         |
|-------------------------------------|-------|----|--------|---------|
| group2                              | N Obs | N  | Mean   | Std Dev |
| Control                             | 59    | 45 | -10.91 | 49.59   |
| Home-based exercise                 | 106   | 85 | 34.55  | 74.98   |

Unadjusted

The GLM Procedure  
Least Squares Means

| group2              | ch_dist6min_m60<br>LSMEAN | Standard<br>Error | H0:LSMEAN=0 |         | H0:LSMean1=LSMean2 |  |
|---------------------|---------------------------|-------------------|-------------|---------|--------------------|--|
|                     |                           |                   | Pr >  t     | t Value | Pr >  t            |  |
| Home-based exercise | 34.5481835                | 7.3040795         | <.0001      | 3.66    | 0.0004             |  |
| Control             | -10.9050667               | 10.0384971        | 0.2794      |         |                    |  |

| group2              | ch_dist6min_m60 LSMEAN | 95% Confidence Limits |           |
|---------------------|------------------------|-----------------------|-----------|
| Home-based exercise | 34.548184              | 20.095814             | 49.000553 |
| Control             | -10.905067             | -30.767948            | 8.957815  |

| Least Squares Means for Effect group2 |   |                          |                                               |
|---------------------------------------|---|--------------------------|-----------------------------------------------|
| i                                     | j | Difference Between Means | 95% Confidence Limits for LSMean(i)-LSMean(j) |
| 1                                     | 2 | 45.453250                | 20.888946 70.017554                           |

Adjusted IPD

The GLM Procedure  
Least Squares Means

| group2              | ch_dist6min_m60 LSMEAN | Standard Error | H0:LSMEAN=0 | H0:LSMean1=LSMean2 |         |
|---------------------|------------------------|----------------|-------------|--------------------|---------|
|                     |                        |                | Pr >  t     | t Value            | Pr >  t |
| Home-based exercise | 43.7667964             | 11.9090504     | 0.0004      | 4.00               | 0.0001  |
| Control             | -7.6387725             | 14.5772830     | 0.6012      |                    |         |

| group2              | ch_dist6min_m60 LSMEAN | 95% Confidence Limits |           |
|---------------------|------------------------|-----------------------|-----------|
| Home-based exercise | 43.766796              | 20.189690             | 67.343903 |
| Control             | -7.638772              | -36.498349            | 21.220804 |

| Least Squares Means for Effect group2 |   |                          |                                               |
|---------------------------------------|---|--------------------------|-----------------------------------------------|
| i                                     | j | Difference Between Means | 95% Confidence Limits for LSMean(i)-LSMean(j) |
| 1                                     | 2 | 51.405569                | 25.956550 76.854588                           |

\*\*Home-based exercise studies combined;

Unadjusted

The GLM Procedure  
Least Squares Means

| group2              | ch_dist6min_m60 LSMEAN | Standard Error | H0:LSMEAN=0 | H0:LSMean1=LSMean2 |         |
|---------------------|------------------------|----------------|-------------|--------------------|---------|
|                     |                        |                | Pr >  t     | t Value            | Pr >  t |
| Home-based exercise | 38.6264196             | 5.2881357      | <.0001      | 6.25               | <.0001  |

| group2  | ch_dist6min_m60 LSMEAN | Standard Error | H0:LSMEAN=0 | H0:LSMean1=LSMean2 |         |
|---------|------------------------|----------------|-------------|--------------------|---------|
|         |                        |                | Pr >  t     | t Value            | Pr >  t |
| Control | -12.1103745            | 6.1574025      | 0.0501      |                    |         |

| group2              | ch_dist6min_m60 LSMEAN | 95% Confidence Limits |           |
|---------------------|------------------------|-----------------------|-----------|
| Home-based exercise | 38.626420              | 28.219312             | 49.033527 |
| Control             | -12.110374             | -24.228209            | 0.007460  |

| Least Squares Means for Effect group2 |   |                          |                                               |           |
|---------------------------------------|---|--------------------------|-----------------------------------------------|-----------|
| i                                     | j | Difference Between Means | 95% Confidence Limits for LSMean(i)-LSMean(j) |           |
| 1                                     | 2 | 50.736794                | 34.756110                                     | 66.717479 |

Adjusted IPD

The GLM Procedure  
Least Squares Means

| group2              | ch_dist6min_m60 LSMEAN | Standard Error | H0:LSMEAN=0 | H0:LSMean1=LSMean2 |         |
|---------------------|------------------------|----------------|-------------|--------------------|---------|
|                     |                        |                | Pr >  t     | t Value            | Pr >  t |
| Home-based exercise | 38.7115598             | 8.0983393      | <.0001      | 6.90               | <.0001  |
| Control             | -16.8832812            | 8.8723027      | 0.0580      |                    |         |

| group2              | ch_dist6min_m60 LSMEAN | 95% Confidence Limits |           |
|---------------------|------------------------|-----------------------|-----------|
| Home-based exercise | 38.711560              | 22.772356             | 54.650763 |
| Control             | -16.883281             | -34.345805            | 0.579242  |

| Least Squares Means for Effect group2 |   |                          |                                               |           |
|---------------------------------------|---|--------------------------|-----------------------------------------------|-----------|
| i                                     | j | Difference Between Means | 95% Confidence Limits for LSMean(i)-LSMean(j) |           |
| 1                                     | 2 | 55.594841                | 39.731767                                     | 71.457915 |

\*\*maximal treadmill walking distance;

\*\*GOALS;

Group mean and stddev

The MEANS Procedure

| Analysis Variable : ch_t_dist_meter60 |       |    |       |         |
|---------------------------------------|-------|----|-------|---------|
| group2                                | N Obs | N  | Mean  | Std Dev |
| Control                               | 92    | 82 | 33.03 | 161.61  |
| Home-based exercise                   | 92    | 82 | 89.26 | 173.40  |

Unadjusted

The GLM Procedure  
Least Squares Means

| group2              | ch_t_dist_meter60<br>LSMEAN | Standard<br>Error | H0:LSMEAN=0 | H0:LSMean1=LSMean2 |         |
|---------------------|-----------------------------|-------------------|-------------|--------------------|---------|
|                     |                             |                   | Pr >  t     | t Value            | Pr >  t |
| Home-based exercise | 89.2553522                  | 18.5093785        | <.0001      | 2.15               | 0.0332  |
| Control             | 33.0291688                  | 18.5093785        | 0.0762      |                    |         |

| group2              | ch_t_dist_meter60<br>LSMEAN | 95% Confidence Limits |            |
|---------------------|-----------------------------|-----------------------|------------|
| Home-based exercise | 89.255352                   | 52.704590             | 125.806114 |
| Control             | 33.029169                   | -3.521593             | 69.579931  |

Least Squares Means for Effect group2

| i | j | Difference Between<br>Means | 95% Confidence Limits for LSMean(i)-LSMean(j) |            |
|---|---|-----------------------------|-----------------------------------------------|------------|
| 1 | 2 | 56.226183                   | 4.535600                                      | 107.916767 |

Adjusted IPD

The GLM Procedure  
Least Squares Means

| group2              | ch_t_dist_meter60<br>LSMEAN | Standard<br>Error | H0:LSMEAN=0 | H0:LSMean1=LSMean2 |         |
|---------------------|-----------------------------|-------------------|-------------|--------------------|---------|
|                     |                             |                   | Pr >  t     | t Value            | Pr >  t |
| Home-based exercise | 62.1937119                  | 29.3394979        | 0.0356      | 1.97               | 0.0512  |
| Control             | 9.8297283                   | 30.0665101        | 0.7442      |                    |         |

| group2              | ch_t_dist_meter60<br>LSMEAN | 95% Confidence Limits |            |
|---------------------|-----------------------------|-----------------------|------------|
| Home-based exercise | 62.193712                   | 4.236845              | 120.150578 |
| Control             | 9.829728                    | -49.563269            | 69.222725  |

| Least Squares Means for Effect group2 |   |                          |                                               |            |
|---------------------------------------|---|--------------------------|-----------------------------------------------|------------|
| i                                     | j | Difference Between Means | 95% Confidence Limits for LSMean(i)-LSMean(j) |            |
| 1                                     | 2 | 52.363984                | -0.266896                                     | 104.994863 |

\*\*LITE;

Group mean and stddev

The MEANS Procedure

| Analysis Variable : ch_t_dist_meter60 |       |    |       |         |
|---------------------------------------|-------|----|-------|---------|
| group2                                | N Obs | N  | Mean  | Std Dev |
| Control                               | 59    | 31 | 38.60 | 120.76  |
| Home-based exercise                   | 106   | 59 | 97.78 | 161.23  |

Unadjusted

The GLM Procedure  
Least Squares Means

| group2              | ch_t_dist_meter60<br>LSMEAN | Standard<br>Error | H0:LSMEAN=0 | H0:LSMean1=LSMean2 |         |
|---------------------|-----------------------------|-------------------|-------------|--------------------|---------|
|                     |                             |                   | Pr >  t     | t Value            | Pr >  t |
| Home-based exercise | 97.7767403                  | 19.3559590        | <.0001      | 1.79               | 0.0762  |
| Control             | 38.5968568                  | 26.7029875        | 0.1519      |                    |         |

| group2              | ch_t_dist_meter60<br>LSMEAN | 95% Confidence Limits |            |
|---------------------|-----------------------------|-----------------------|------------|
| Home-based exercise | 97.776740                   | 59.310839             | 136.242641 |
| Control             | 38.596857                   | -14.469720            | 91.663433  |

| Least Squares Means for Effect group2 |   |                          |                                               |            |
|---------------------------------------|---|--------------------------|-----------------------------------------------|------------|
| i                                     | j | Difference Between Means | 95% Confidence Limits for LSMean(i)-LSMean(j) |            |
| 1                                     | 2 | 59.179884                | -6.361608                                     | 124.721375 |

Adjusted IPD

The GLM Procedure

Least Squares Means

| group2              | ch_t_dist_meter60<br>LSMEAN | Standard<br>Error | H0:LSMEAN=0 | H0:LSMean1=LSMean2 |         |
|---------------------|-----------------------------|-------------------|-------------|--------------------|---------|
|                     |                             |                   | Pr >  t     | t Value            | Pr >  t |
| Home-based exercise | 118.076122                  | 32.034438         | 0.0004      | 1.53               | 0.1297  |
| Control             | 65.389149                   | 40.619474         | 0.1113      |                    |         |

| group2              | ch_t_dist_meter60<br>LSMEAN | 95% Confidence Limits |            |
|---------------------|-----------------------------|-----------------------|------------|
| Home-based exercise | 118.076122                  | 54.337639             | 181.814604 |
| Control             | 65.389149                   | -15.430863            | 146.209161 |

| Least Squares Means for Effect group2 |   |                          |                                               |            |
|---------------------------------------|---|--------------------------|-----------------------------------------------|------------|
| i                                     | j | Difference Between Means | 95% Confidence Limits for LSMean(i)-LSMean(j) |            |
| 1                                     | 2 | 52.686973                | -15.798772                                    | 121.172717 |

\*\*Home-based exercise studies combined;

Unadjusted

The GLM Procedure  
Least Squares Means

| group2              | ch_t_dist_meter60<br>LSMEAN | Standard<br>Error | H0:LSMEAN=0 | H0:LSMean1=LSMean2 |         |
|---------------------|-----------------------------|-------------------|-------------|--------------------|---------|
|                     |                             |                   | Pr >  t     | t Value            | Pr >  t |
| Home-based exercise | 93.4206491                  | 13.6598277        | <.0001      | 2.78               | 0.0058  |
| Control             | 36.2156076                  | 15.8822383        | 0.0234      |                    |         |

| group2              | ch_t_dist_meter60<br>LSMEAN | 95% Confidence Limits |            |
|---------------------|-----------------------------|-----------------------|------------|
| Home-based exercise | 93.420649                   | 66.518162             | 120.323136 |
| Control             | 36.215608                   | 4.936171              | 67.495044  |

| Least Squares Means for Effect group2 |   |                          |                                               |           |
|---------------------------------------|---|--------------------------|-----------------------------------------------|-----------|
| i                                     | j | Difference Between Means | 95% Confidence Limits for LSMean(i)-LSMean(j) |           |
| 1                                     | 2 | 57.205041                | 16.744002                                     | 97.666081 |

Adjusted IPD

The GLM Procedure  
Least Squares Means



| group2              | ch_t_dist_meter60<br>LSMEAN | Standard<br>Error | H0:LSMEAN=0 |         | H0:LSMean1=LSMean2 |  |
|---------------------|-----------------------------|-------------------|-------------|---------|--------------------|--|
|                     |                             |                   | Pr >  t     | t Value | Pr >  t            |  |
| Home-based exercise | 82.1526162                  | 21.3455198        | 0.0002      | 2.58    | 0.0105             |  |
| Control             | 28.5043233                  | 23.8416995        | 0.2330      |         |                    |  |

| group2              | ch_t_dist_meter60<br>LSMEAN | 95% Confidence Limits |            |
|---------------------|-----------------------------|-----------------------|------------|
| Home-based exercise | 82.152616                   | 40.107620             | 124.197612 |
| Control             | 28.504323                   | -18.457483            | 75.466129  |

| Least Squares Means for Effect group2 |   |                          |                                               |           |
|---------------------------------------|---|--------------------------|-----------------------------------------------|-----------|
| i                                     | j | Difference Between Means | 95% Confidence Limits for LSMean(i)-LSMean(j) |           |
| 1                                     | 2 | 53.648293                | 12.654434                                     | 94.642152 |

\*\*pain-free treadmill walking distance;

\*\*GOALS;

Group mean and stddev

The MEANS Procedure

| Analysis Variable : ch_on_dist_meter60 |       |    |       |         |
|----------------------------------------|-------|----|-------|---------|
| group2                                 | N Obs | N  | Mean  | Std Dev |
| Control                                | 92    | 82 | 25.30 | 124.61  |
| Home-based exercise                    | 92    | 82 | 75.28 | 156.64  |

Unadjusted

The GLM Procedure  
Least Squares Means

| group2              | ch_on_dist_meter60<br>LSMEAN | Standard<br>Error | H0:LSMEAN=0 |         | H0:LSMean1=LSMean2 |  |
|---------------------|------------------------------|-------------------|-------------|---------|--------------------|--|
|                     |                              |                   | Pr >  t     | t Value | Pr >  t            |  |
| Home-based exercise | 75.2771746                   | 15.6298268        | <.0001      | 2.26    | 0.0251             |  |
| Control             | 25.2986478                   | 15.6298268        | 0.1075      |         |                    |  |

| group2              | ch_on_dist_meter60<br>LSMEAN | 95% Confidence Limits |            |
|---------------------|------------------------------|-----------------------|------------|
| Home-based exercise | 75.277175                    | 44.412709             | 106.141640 |
| Control             | 25.298648                    | -5.565818             | 56.163113  |

| Least Squares Means for Effect group2 |   |                          |                                               |
|---------------------------------------|---|--------------------------|-----------------------------------------------|
| i                                     | j | Difference Between Means | 95% Confidence Limits for LSMean(i)-LSMean(j) |
| 1                                     | 2 | 49.978527                | 6.329581 93.627473                            |

Adjusted IPD

The GLM Procedure  
Least Squares Means

| group2              | ch_on_dist_meter60<br>LSMEAN | Standard Error | H0:LSMEAN=0 | H0:LSMean1=LSMean2 |         |
|---------------------|------------------------------|----------------|-------------|--------------------|---------|
|                     |                              |                | Pr >  t     | t Value            | Pr >  t |
| Home-based exercise | 63.4101537                   | 24.3113861     | 0.0100      | 1.94               | 0.0546  |
| Control             | 20.6597010                   | 24.6077372     | 0.4024      |                    |         |

| group2              | ch_on_dist_meter60<br>LSMEAN | 95% Confidence Limits |            |
|---------------------|------------------------------|-----------------------|------------|
| Home-based exercise | 63.410154                    | 15.385754             | 111.434553 |
| Control             | 20.659701                    | -27.950106            | 69.269508  |

| Least Squares Means for Effect group2 |   |                          |                                               |
|---------------------------------------|---|--------------------------|-----------------------------------------------|
| i                                     | j | Difference Between Means | 95% Confidence Limits for LSMean(i)-LSMean(j) |
| 1                                     | 2 | 42.750453                | -0.862145 86.363051                           |

\*\*LITE;

Group mean and stddev

The MEANS Procedure

| Analysis Variable : ch_on_dist_meter60 |       |    |       |         |
|----------------------------------------|-------|----|-------|---------|
| group2                                 | N Obs | N  | Mean  | Std Dev |
| Control                                | 59    | 31 | 62.92 | 185.26  |
| Home-based exercise                    | 106   | 59 | 92.36 | 236.10  |

Unadjusted

The GLM Procedure  
Least Squares Means

| group2              | ch_on_dist_meter60<br>LSMEAN | Standard<br>Error | H0:LSMEAN=0 | H0:LSMean1=LSMean2 |         |
|---------------------|------------------------------|-------------------|-------------|--------------------|---------|
|                     |                              |                   | Pr >  t     | t Value            | Pr >  t |
| Home-based exercise | 92.3630102                   | 28.6537229        | 0.0018      | 0.60               | 0.5481  |
| Control             | 62.9244852                   | 39.5299455        | 0.1150      |                    |         |

| group2              | ch_on_dist_meter60<br>LSMEAN | 95% Confidence Limits |            |
|---------------------|------------------------------|-----------------------|------------|
| Home-based exercise | 92.363010                    | 35.419757             | 149.306263 |
| Control             | 62.924485                    | -15.632975            | 141.481945 |

| Least Squares Means for Effect group2 |   |                             |                                               |            |
|---------------------------------------|---|-----------------------------|-----------------------------------------------|------------|
| i                                     | j | Difference Between<br>Means | 95% Confidence Limits for LSMean(i)-LSMean(j) |            |
| 1                                     | 2 | 29.438525                   | -67.586258                                    | 126.463308 |

Adjusted IPD

The GLM Procedure  
Least Squares Means

| group2              | ch_on_dist_meter60<br>LSMEAN | Standard<br>Error | H0:LSMEAN=0 | H0:LSMean1=LSMean2 |         |
|---------------------|------------------------------|-------------------|-------------|--------------------|---------|
|                     |                              |                   | Pr >  t     | t Value            | Pr >  t |
| Home-based exercise | 99.4678951                   | 43.4179521        | 0.0246      | 1.18               | 0.2400  |
| Control             | 44.5476452                   | 54.9033027        | 0.4195      |                    |         |

| group2              | ch_on_dist_meter60<br>LSMEAN | 95% Confidence Limits |            |
|---------------------|------------------------------|-----------------------|------------|
| Home-based exercise | 99.467895                    | 13.079790             | 185.856001 |
| Control             | 44.547645                    | -64.692705            | 153.787996 |

| Least Squares Means for Effect group2 |   |                          |                                               |
|---------------------------------------|---|--------------------------|-----------------------------------------------|
| i                                     | j | Difference Between Means | 95% Confidence Limits for LSMean(i)-LSMean(j) |
| 1                                     | 2 | 54.920250                | -37.392982 147.233482                         |

\*\*Home-based exercise studies combined;

Unadjusted

The GLM Procedure  
Least Squares Means

| group2              | ch_on_dist_meter60<br>LSMEAN | Standard Error | H0:LSMEAN=0 | H0:LSMean1=LSMean2 |         |
|---------------------|------------------------------|----------------|-------------|--------------------|---------|
|                     |                              |                | Pr >  t     | t Value            | Pr >  t |
| Home-based exercise | 84.4834835                   | 14.6905162     | <.0001      | 1.95               | 0.0518  |
| Control             | 41.3119259                   | 17.0806166     | 0.0163      |                    |         |

| group2              | ch_on_dist_meter60<br>LSMEAN | 95% Confidence Limits |            |
|---------------------|------------------------------|-----------------------|------------|
| Home-based exercise | 84.483483                    | 55.551096             | 113.415871 |
| Control             | 41.311926                    | 7.672331              | 74.951521  |

| Least Squares Means for Effect group2 |   |                          |                                               |
|---------------------------------------|---|--------------------------|-----------------------------------------------|
| i                                     | j | Difference Between Means | 95% Confidence Limits for LSMean(i)-LSMean(j) |
| 1                                     | 2 | 43.171558                | -0.342429 86.685544                           |

Adjusted IPD

The GLM Procedure  
Least Squares Means

| group2              | ch_on_dist_meter60<br>LSMEAN | Standard Error | H0:LSMEAN=0 | H0:LSMean1=LSMean2 |         |
|---------------------|------------------------------|----------------|-------------|--------------------|---------|
|                     |                              |                | Pr >  t     | t Value            | Pr >  t |
| Home-based exercise | 73.1889135                   | 22.1043704     | 0.0011      | 1.96               | 0.0515  |
| Control             | 31.1726401                   | 24.4442777     | 0.2034      |                    |         |

| group2              | ch_on_dist_meter60<br>LSMEAN | 95% Confidence Limits |            |
|---------------------|------------------------------|-----------------------|------------|
| Home-based exercise | 73.188914                    | 29.649184             | 116.728643 |
| Control             | 31.172640                    | -16.976085            | 79.321365  |

| Least Squares Means for Effect group2 |   |                          |                                               |
|---------------------------------------|---|--------------------------|-----------------------------------------------|
| i                                     | j | Difference Between Means | 95% Confidence Limits for LSMean(i)-LSMean(j) |
| 1                                     | 2 | 42.016273                | -0.282796 84.315343                           |

\*\*WIIQ distance score;

\*\*GOALS;

Group mean and stddev

The MEANS Procedure

| Analysis Variable : ch_distscr60 |       |    |       |         |
|----------------------------------|-------|----|-------|---------|
| group2                           | N Obs | N  | Mean  | Std Dev |
| Control                          | 92    | 83 | 1.45  | 20.00   |
| Home-based exercise              | 92    | 84 | 11.61 | 26.94   |

Unadjusted

The GLM Procedure  
Least Squares Means

| group2              | ch_distscr60 LSMEAN | Standard Error | H0:LSMEAN=0 | H0:LSMean1=LSMean2 |         |
|---------------------|---------------------|----------------|-------------|--------------------|---------|
|                     |                     |                | Pr >  t     | t Value            | Pr >  t |
| Home-based exercise | 11.6105249          | 2.5910058      | <.0001      | 2.77               | 0.0063  |
| Control             | 1.4469811           | 2.6065676      | 0.5796      |                    |         |

| group2              | ch_distscr60 LSMEAN | 95% Confidence Limits |           |
|---------------------|---------------------|-----------------------|-----------|
| Home-based exercise | 11.610525           | 6.494725              | 16.726325 |
| Control             | 1.446981            | -3.699545             | 6.593507  |

| Least Squares Means for Effect group2 |   |                          |                                               |
|---------------------------------------|---|--------------------------|-----------------------------------------------|
| i                                     | j | Difference Between Means | 95% Confidence Limits for LSMean(i)-LSMean(j) |
| 1                                     | 2 | 10.163544                | 2.906951 17.420137                            |

Adjusted IPD

The GLM Procedure  
Least Squares Means

| group2              | ch_distscr60 LSMEAN | Standard Error | H0:LSMEAN=0 | H0:LSMean1=LSMean2 |         |
|---------------------|---------------------|----------------|-------------|--------------------|---------|
|                     |                     |                | Pr >  t     | t Value            | Pr >  t |
| Home-based exercise | 8.70143523          | 3.82790139     | 0.0244      | 3.24               | 0.0015  |
| Control             | -2.45904709         | 3.94482852     | 0.5339      |                    |         |

| group2              | ch_distscr60 LSMEAN | 95% Confidence Limits |           |
|---------------------|---------------------|-----------------------|-----------|
| Home-based exercise | 8.701435            | 1.140978              | 16.261893 |
| Control             | -2.459047           | -10.250447            | 5.332352  |

| Least Squares Means for Effect group2 |   |                          |                                               |
|---------------------------------------|---|--------------------------|-----------------------------------------------|
| i                                     | j | Difference Between Means | 95% Confidence Limits for LSMean(i)-LSMean(j) |
| 1                                     | 2 | 11.160482                | 4.354940 17.966024                            |

\*\*LITE;

Group mean and stddev

The MEANS Procedure

| Analysis Variable : ch_distscr60 |       |    |      |         |
|----------------------------------|-------|----|------|---------|
| group2                           | N Obs | N  | Mean | Std Dev |
| Control                          | 59    | 47 | 1.15 | 24.31   |
| Home-based exercise              | 106   | 86 | 8.72 | 21.78   |

Unadjusted

The GLM Procedure  
Least Squares Means

| group2              | ch_distscr60 LSMEAN | Standard Error | H0:LSMEAN=0 | H0:LSMean1=LSMean2 |         |
|---------------------|---------------------|----------------|-------------|--------------------|---------|
|                     |                     |                | Pr >  t     | t Value            | Pr >  t |
| Home-based exercise | 8.71927854          | 2.44799136     | 0.0005      | 1.84               | 0.0683  |

| group2  | ch_distscr60 LSMEAN | Standard Error | H0:LSMEAN=0 | H0:LSMean1=LSMean2 |         |
|---------|---------------------|----------------|-------------|--------------------|---------|
|         |                     |                | Pr >  t     | t Value            | Pr >  t |
| Control | 1.14845261          | 3.31138882     | 0.7293      |                    |         |

| group2              | ch_distscr60 LSMEAN | 95% Confidence Limits |           |
|---------------------|---------------------|-----------------------|-----------|
| Home-based exercise | 8.719279            | 3.876568              | 13.561989 |
| Control             | 1.148453            | -5.402264             | 7.699170  |

| Least Squares Means for Effect group2 |   |                          |                                               |           |
|---------------------------------------|---|--------------------------|-----------------------------------------------|-----------|
| i                                     | j | Difference Between Means | 95% Confidence Limits for LSMean(i)-LSMean(j) |           |
| 1                                     | 2 | 7.570826                 | -0.575568                                     | 15.717220 |

Adjusted IPD

The GLM Procedure  
Least Squares Means

| group2              | ch_distscr60 LSMEAN | Standard Error | H0:LSMEAN=0 | H0:LSMean1=LSMean2 |         |
|---------------------|---------------------|----------------|-------------|--------------------|---------|
|                     |                     |                | Pr >  t     | t Value            | Pr >  t |
| Home-based exercise | 6.41927519          | 3.84610103     | 0.0976      | 2.37               | 0.0195  |
| Control             | -3.41847803         | 4.66820352     | 0.4654      |                    |         |

| group2              | ch_distscr60 LSMEAN | 95% Confidence Limits |           |
|---------------------|---------------------|-----------------------|-----------|
| Home-based exercise | 6.419275            | -1.193236             | 14.031786 |
| Control             | -3.418478           | -12.658160            | 5.821204  |

| Least Squares Means for Effect group2 |   |                          |                                               |           |
|---------------------------------------|---|--------------------------|-----------------------------------------------|-----------|
| i                                     | j | Difference Between Means | 95% Confidence Limits for LSMean(i)-LSMean(j) |           |
| 1                                     | 2 | 9.837753                 | 1.611502                                      | 18.064005 |

\*\*Home-based exercise studies combined;

Unadjusted

The GLM Procedure  
Least Squares Means

| group2              | ch_distscr60 LSMEAN | Standard Error | H0:LSMEAN=0 | H0:LSMean1=LSMean2 |         |
|---------------------|---------------------|----------------|-------------|--------------------|---------|
|                     |                     |                | Pr >  t     | t Value            | Pr >  t |
| Home-based exercise | 10.1585894          | 1.7839933      | <.0001      | 3.31               | 0.0010  |
| Control             | 1.0873078           | 2.0747585      | 0.6006      |                    |         |

| group2              | ch_distscr60 LSMEAN | 95% Confidence Limits |           |
|---------------------|---------------------|-----------------------|-----------|
| Home-based exercise | 10.158589           | 6.647720              | 13.669459 |
| Control             | 1.087308            | -2.995783             | 5.170398  |

| Least Squares Means for Effect group2 |   |                          |                                               |           |
|---------------------------------------|---|--------------------------|-----------------------------------------------|-----------|
| i                                     | j | Difference Between Means | 95% Confidence Limits for LSMean(i)-LSMean(j) |           |
| 1                                     | 2 | 9.071282                 | 3.681949                                      | 14.460614 |

Adjusted IPD

The GLM Procedure  
Least Squares Means

| group2              | ch_distscr60 LSMEAN | Standard Error | H0:LSMEAN=0 | H0:LSMean1=LSMean2 |         |
|---------------------|---------------------|----------------|-------------|--------------------|---------|
|                     |                     |                | Pr >  t     | t Value            | Pr >  t |
| Home-based exercise | 6.64007401          | 2.64137430     | 0.0125      | 4.01               | <.0001  |
| Control             | -3.86389655         | 2.92318376     | 0.1873      |                    |         |

| group2              | ch_distscr60 LSMEAN | 95% Confidence Limits |           |
|---------------------|---------------------|-----------------------|-----------|
| Home-based exercise | 6.640074            | 1.441380              | 11.838769 |
| Control             | -3.863897           | -9.617242             | 1.889449  |

| Least Squares Means for Effect group2 |   |                          |                                               |           |
|---------------------------------------|---|--------------------------|-----------------------------------------------|-----------|
| i                                     | j | Difference Between Means | 95% Confidence Limits for LSMean(i)-LSMean(j) |           |
| 1                                     | 2 | 10.503971                | 5.353215                                      | 15.654726 |

\*\*WIQ speed score;

\*\*GOALS;

Group mean and stddev



The MEANS Procedure

| Analysis Variable : ch_speedscr60 |       |    |       |         |
|-----------------------------------|-------|----|-------|---------|
| group2                            | N Obs | N  | Mean  | Std Dev |
| Control                           | 92    | 85 | 1.84  | 23.66   |
| Home-based exercise               | 92    | 84 | 11.57 | 24.11   |

Unadjusted

The GLM Procedure  
Least Squares Means

| group2              | ch_speedscr60 LSMEAN | Standard Error | H0:LSMEAN=0 | H0:LSMean1=LSMean2 |         |
|---------------------|----------------------|----------------|-------------|--------------------|---------|
|                     |                      |                | Pr >  t     | t Value            | Pr >  t |
| Home-based exercise | 11.5683230           | 2.6062093      | <.0001      | 2.65               | 0.0089  |
| Control             | 1.8414322            | 2.5908333      | 0.4782      |                    |         |

| group2              | ch_speedscr60 LSMEAN | 95% Confidence Limits |           |
|---------------------|----------------------|-----------------------|-----------|
| Home-based exercise | 11.568323            | 6.422960              | 16.713686 |
| Control             | 1.841432             | -3.273575             | 6.956439  |

Least Squares Means for Effect group2

| i | j | Difference Between Means | 95% Confidence Limits for LSMean(i)-LSMean(j) |           |
|---|---|--------------------------|-----------------------------------------------|-----------|
| 1 | 2 | 9.726891                 | 2.471681                                      | 16.982100 |

Adjusted IPD

The GLM Procedure  
Least Squares Means

| group2              | ch_speedscr60 LSMEAN | Standard Error | H0:LSMEAN=0 | H0:LSMean1=LSMean2 |         |
|---------------------|----------------------|----------------|-------------|--------------------|---------|
|                     |                      |                | Pr >  t     | t Value            | Pr >  t |
| Home-based exercise | 12.8474914           | 3.5586129      | 0.0004      | 2.65               | 0.0088  |
| Control             | 4.1658763            | 3.5488608      | 0.2422      |                    |         |

| group2              | ch_speedscr60 LSMEAN | 95% Confidence Limits |           |
|---------------------|----------------------|-----------------------|-----------|
| Home-based exercise | 12.847491            | 5.819581              | 19.875402 |
| Control             | 4.165876             | -2.842774             | 11.174527 |

| Least Squares Means for Effect group2 |   |                          |                                               |
|---------------------------------------|---|--------------------------|-----------------------------------------------|
| i                                     | j | Difference Between Means | 95% Confidence Limits for LSMean(i)-LSMean(j) |
| 1                                     | 2 | 8.681615                 | 2.214677 15.148553                            |

\*\*LITE;

Group mean and stddev

The MEANS Procedure

| Analysis Variable : ch_speedscr60 |       |    |       |         |
|-----------------------------------|-------|----|-------|---------|
| group2                            | N Obs | N  | Mean  | Std Dev |
| Control                           | 59    | 47 | -4.95 | 23.42   |
| Home-based exercise               | 106   | 86 | 7.13  | 20.42   |

Unadjusted

The GLM Procedure  
Least Squares Means

| group2              | ch_speedscr60 LSMEAN | Standard Error | H0:LSMEAN=0 |         |         |
|---------------------|----------------------|----------------|-------------|---------|---------|
|                     |                      |                | Pr >  t     | t Value | Pr >  t |
| Home-based exercise | 7.12841254           | 2.32051351     | 0.0026      | 3.09    | 0.0024  |
| Control             | -4.94912118          | 3.13895001     | 0.1173      |         |         |

| group2              | ch_speedscr60 LSMEAN | 95% Confidence Limits |           |
|---------------------|----------------------|-----------------------|-----------|
| Home-based exercise | 7.128413             | 2.537883              | 11.718942 |
| Control             | -4.949121            | -11.158713            | 1.260471  |

| Least Squares Means for Effect group2 |   |                          |                                               |           |
|---------------------------------------|---|--------------------------|-----------------------------------------------|-----------|
| i                                     | j | Difference Between Means | 95% Confidence Limits for LSMean(i)-LSMean(j) |           |
| 1                                     | 2 | 12.077534                | 4.355358                                      | 19.799709 |

Adjusted IPD

The GLM Procedure  
Least Squares Means

| group2              | ch_speedscr60 LSMEAN | Standard Error | H0:LSMEAN=0 H0:LSMean1=LSMean2 |         |         |
|---------------------|----------------------|----------------|--------------------------------|---------|---------|
|                     |                      |                | Pr >  t                        | t Value | Pr >  t |
| Home-based exercise | 6.12055864           | 3.36877113     | 0.0717                         | 2.93    | 0.0041  |
| Control             | -4.39559401          | 4.04566568     | 0.2794                         |         |         |

| group2              | ch_speedscr60 LSMEAN | 95% Confidence Limits |           |
|---------------------|----------------------|-----------------------|-----------|
| Home-based exercise | 6.120559             | -0.547183             | 12.788300 |
| Control             | -4.395594            | -12.403100            | 3.611912  |

| Least Squares Means for Effect group2 |   |                          |                                               |           |
|---------------------------------------|---|--------------------------|-----------------------------------------------|-----------|
| i                                     | j | Difference Between Means | 95% Confidence Limits for LSMean(i)-LSMean(j) |           |
| 1                                     | 2 | 10.516153                | 3.400595                                      | 17.631710 |

\*\*Home-based exercise studies combined;

Unadjusted

The GLM Procedure  
Least Squares Means

| group2              | ch_speedscr60 LSMEAN | Standard Error | H0:LSMEAN=0 H0:LSMean1=LSMean2 |         |         |
|---------------------|----------------------|----------------|--------------------------------|---------|---------|
|                     |                      |                | Pr >  t                        | t Value | Pr >  t |
| Home-based exercise | 9.35411941           | 1.75219721     | <.0001                         | 4.00    | <.0001  |
| Control             | -1.35623543          | 2.02542104     | 0.5036                         |         |         |

| group2              | ch_speedscr60 LSMEAN | 95% Confidence Limits |           |
|---------------------|----------------------|-----------------------|-----------|
| Home-based exercise | 9.354119             | 5.905919              | 12.802320 |
| Control             | -1.356235            | -5.342122             | 2.629651  |

| Least Squares Means for Effect group2 |   |                          |                                               |
|---------------------------------------|---|--------------------------|-----------------------------------------------|
| i                                     | j | Difference Between Means | 95% Confidence Limits for LSMean(i)-LSMean(j) |
| 1                                     | 2 | 10.710355                | 5.435469 15.985240                            |

Adjusted IPD

The GLM Procedure  
Least Squares Means

| group2              | ch_speedscr60 LSMEAN | Standard Error | H0:LSMEAN=0 | H0:LSMean1=LSMean2 |         |
|---------------------|----------------------|----------------|-------------|--------------------|---------|
|                     |                      |                | Pr >  t     | t Value            | Pr >  t |
| Home-based exercise | 8.71994287           | 2.41113078     | 0.0004      | 4.02               | <.0001  |
| Control             | -0.95164858          | 2.61629477     | 0.7163      |                    |         |

| group2              | ch_speedscr60 LSMEAN | 95% Confidence Limits |           |
|---------------------|----------------------|-----------------------|-----------|
| Home-based exercise | 8.719943             | 3.974545              | 13.465341 |
| Control             | -0.951649            | -6.100834             | 4.197537  |

| Least Squares Means for Effect group2 |   |                          |                                               |
|---------------------------------------|---|--------------------------|-----------------------------------------------|
| i                                     | j | Difference Between Means | 95% Confidence Limits for LSMean(i)-LSMean(j) |
| 1                                     | 2 | 9.671591                 | 4.941003 14.402180                            |

\*\*WIQ stair-climbing score;

\*\*GOALS;

Group mean and stddev

The MEANS Procedure

| Analysis Variable : ch_climbscr60 |       |    |      |         |
|-----------------------------------|-------|----|------|---------|
| group2                            | N Obs | N  | Mean | Std Dev |
| Control                           | 92    | 85 | 0.10 | 31.17   |
| Home-based exercise               | 92    | 84 | 8.73 | 22.29   |

Unadjusted

The GLM Procedure  
Least Squares Means

| group2              | ch_climbscr60 LSMEAN | Standard Error | H0:LSMEAN=0 | H0:LSMean1=LSMean2 |         |
|---------------------|----------------------|----------------|-------------|--------------------|---------|
|                     |                      |                | Pr >  t     | t Value            | Pr >  t |
| Home-based exercise | 8.73015873           | 2.95952041     | 0.0036      | 2.07               | 0.0401  |
| Control             | 0.09803922           | 2.94205996     | 0.9735      |                    |         |

| group2              | ch_climbscr60 LSMEAN | 95% Confidence Limits |           |
|---------------------|----------------------|-----------------------|-----------|
| Home-based exercise | 8.730159             | 2.887264              | 14.573054 |
| Control             | 0.098039             | -5.710384             | 5.906463  |

| Least Squares Means for Effect group2 |   |                          |                                               |           |
|---------------------------------------|---|--------------------------|-----------------------------------------------|-----------|
| i                                     | j | Difference Between Means | 95% Confidence Limits for LSMean(i)-LSMean(j) |           |
| 1                                     | 2 | 8.632120                 | 0.393357                                      | 16.870882 |

Adjusted IPD

The GLM Procedure  
Least Squares Means

| group2              | ch_climbscr60 LSMEAN | Standard Error | H0:LSMEAN=0 | H0:LSMean1=LSMean2 |         |
|---------------------|----------------------|----------------|-------------|--------------------|---------|
|                     |                      |                | Pr >  t     | t Value            | Pr >  t |
| Home-based exercise | 11.9056087           | 3.8257412      | 0.0022      | 2.64               | 0.0090  |
| Control             | 2.6049590            | 3.8152021      | 0.4957      |                    |         |

| group2              | ch_climbscr60 LSMEAN | 95% Confidence Limits |           |
|---------------------|----------------------|-----------------------|-----------|
| Home-based exercise | 11.905609            | 4.350146              | 19.461071 |
| Control             | 2.604959             | -4.929690             | 10.139608 |

| Least Squares Means for Effect group2 |   |                          |                                               |           |
|---------------------------------------|---|--------------------------|-----------------------------------------------|-----------|
| i                                     | j | Difference Between Means | 95% Confidence Limits for LSMean(i)-LSMean(j) |           |
| 1                                     | 2 | 9.300650                 | 2.356053                                      | 16.245246 |

\*\*LITE;

Group mean and stddev

The MEANS Procedure

**Analysis Variable : ch\_climbscr60**

| group2              | N Obs | N  | Mean  | Std Dev |
|---------------------|-------|----|-------|---------|
| Control             | 59    | 47 | -4.96 | 28.71   |
| Home-based exercise | 106   | 86 | 4.41  | 22.99   |

Unadjusted

The GLM Procedure  
Least Squares Means

| group2              | ch_climbscr60 LSMEAN | Standard Error | H0:LSMEAN=0 | H0:LSMean1=LSMean2 |         |
|---------------------|----------------------|----------------|-------------|--------------------|---------|
|                     |                      |                | Pr >  t     | t Value            | Pr >  t |
| Home-based exercise | 4.40891473           | 2.71177380     | 0.1064      | 2.05               | 0.0419  |
| Control             | -4.96453901          | 3.66820634     | 0.1783      |                    |         |

| group2              | ch_climbscr60 LSMEAN | 95% Confidence Limits |          |
|---------------------|----------------------|-----------------------|----------|
| Home-based exercise | 4.408915             | -0.955621             | 9.773450 |
| Control             | -4.964539            | -12.221126            | 2.292048 |

**Least Squares Means for Effect group2**

| i | j | Difference Between Means | 95% Confidence Limits for LSMean(i)-LSMean(j) |           |
|---|---|--------------------------|-----------------------------------------------|-----------|
| 1 | 2 | 9.373454                 | 0.349248                                      | 18.397660 |

Adjusted IPD

The GLM Procedure  
Least Squares Means

| group2              | ch_climbscr60 LSMEAN | Standard Error | H0:LSMEAN=0 | H0:LSMean1=LSMean2 |         |
|---------------------|----------------------|----------------|-------------|--------------------|---------|
|                     |                      |                | Pr >  t     | t Value            | Pr >  t |
| Home-based exercise | 7.78791378           | 4.14176998     | 0.0624      | 2.82               | 0.0056  |
| Control             | -4.88240612          | 4.99945682     | 0.3307      |                    |         |

| group2              | ch_climbscr60 LSMEAN | 95% Confidence Limits |           |
|---------------------|----------------------|-----------------------|-----------|
| Home-based exercise | 7.787914             | -0.409809             | 15.985637 |

| group2  | ch_climbscr60 LSMEAN | 95% Confidence Limits |          |
|---------|----------------------|-----------------------|----------|
| Control | -4.882406            | -14.777732            | 5.012919 |

| Least Squares Means for Effect group2 |   |                          |                                               |
|---------------------------------------|---|--------------------------|-----------------------------------------------|
| i                                     | j | Difference Between Means | 95% Confidence Limits for LSMean(i)-LSMean(j) |
| 1                                     | 2 | 12.670320                | 3.783843 21.556797                            |

\*\*Home-based exercise studies combined;

Unadjusted

The GLM Procedure  
Least Squares Means

| group2              | ch_climbscr60 LSMEAN | Standard Error | H0:LSMEAN=0 | H0:LSMean1=LSMean2 |         |
|---------------------|----------------------|----------------|-------------|--------------------|---------|
|                     |                      |                | Pr >  t     | t Value            | Pr >  t |
| Home-based exercise | 6.57135066           | 2.01187320     | 0.0012      | 2.91               | 0.0039  |
| Control             | -2.37092893          | 2.32558885     | 0.3088      |                    |         |

| group2              | ch_climbscr60 LSMEAN | 95% Confidence Limits |           |
|---------------------|----------------------|-----------------------|-----------|
| Home-based exercise | 6.571351             | 2.612126              | 10.530576 |
| Control             | -2.370929            | -6.947524             | 2.205666  |

| Least Squares Means for Effect group2 |   |                          |                                               |
|---------------------------------------|---|--------------------------|-----------------------------------------------|
| i                                     | j | Difference Between Means | 95% Confidence Limits for LSMean(i)-LSMean(j) |
| 1                                     | 2 | 8.942280                 | 2.885655 14.998904                            |

Adjusted IPD

The GLM Procedure  
Least Squares Means

| group2              | ch_climbscr60 LSMEAN | Standard Error | H0:LSMEAN=0 | H0:LSMean1=LSMean2 |         |
|---------------------|----------------------|----------------|-------------|--------------------|---------|
|                     |                      |                | Pr >  t     | t Value            | Pr >  t |
| Home-based exercise | 8.95034743           | 2.76278943     | 0.0013      | 3.81               | 0.0002  |
| Control             | -1.60993892          | 3.01175406     | 0.5934      |                    |         |

| group2              | ch_climbscr60 LSMEAN | 95% Confidence Limits |           |
|---------------------|----------------------|-----------------------|-----------|
| Home-based exercise | 8.950347             | 3.512842              | 14.387852 |
| Control             | -1.609939            | -7.537437             | 4.317559  |

| Least Squares Means for Effect group2 |   |                          |                                               |
|---------------------------------------|---|--------------------------|-----------------------------------------------|
| i                                     | j | Difference Between Means | 95% Confidence Limits for LSMean(i)-LSMean(j) |
| 1                                     | 2 | 10.560286                | 5.106313 16.014260                            |
