# Supplementary material for: Home-Based Walking Exercise and Supervised Treadmill Exercise in Patients With Peripheral Artery Disease: An Individual Participant Data Meta-Analysis
Source: PubMed Central journal article supplement (PMC10514734; doi:10.1001/jamanetworkopen.2023.34590), 2023-09-21
Supplement: jamanetwopen-e2334590-s002.pdf [file jamanetwopen-e2334590-s002.pdf]

## Data Sharing Statement

Thangada. Home-Based Walking Exercise and Supervised Treadmill Exercise in Patients With Peripheral Artery Disease. *JAMA Netw Open*. Published September 19, 2023.

doi:10.1001/jamanetworkopen.2023.34590

### Data

**Data available:** Yes

**Data types:** Other (please specify)

**Additional Information:** Summary data can be made available

**How to access data:** Mary M. McDermott, MD can be reached at

[mdm608@Northwestern.edu](mailto:mdm608@Northwestern.edu)

**When available:** With publication

### Supporting Documents

**Document types:** None

### Additional Information

**Who can access the data:** Upon reasonable request to the study Principal Investigator

**Types of analyses:** For a specific purpose

**Mechanisms of data availability:** After approval of a proposal, without investigator support

**Any additional restrictions:** None
